# Supplementary material for: Phylloplane Biodiversity and Activity in the City at Different Distances from the Traffic Pollution Source
Source: MDPI journal article supplement (doi:10.3390/plants11030402), 2022-01-31
Supplement: s1 [file s1]

Table S1 Portion of opportunistic fungi in total amount of fungi (%)

| Distance, m | Cultivated fungi      |      |                   | Sequenced ITS of fungi |      |                   |
|-------------|-----------------------|------|-------------------|------------------------|------|-------------------|
|             | opportunistic<br>BSL2 | BSL1 | non-opportunistic | opportunistic<br>BSL2  | BSL1 | non-opportunistic |
| 2           | 37                    | 25   | 38                | 0.01                   | 7    | 93                |
| 10          | 33                    | 33   | 34                | 0.01                   | 9    | 91                |
| 30          | 0                     | 17   | 83                | 0.15                   | 5    | 95                |
| 50          | 0                     | 30   | 70                | 0.03                   | 3    | 97                |
