# Supplementary material for: Phylloplane Biodiversity and Activity in the City at Different Distances from the Traffic Pollution Source
Source: MDPI journal article supplement (doi:10.3390/plants11030402), 2022-01-31
Supplement: s1 [file s1]

Table S2. Cultivable bacteria distribution along transect from roadside to the forest (2-50 m)

| Distance to the road, m | Total number of bacteria, mln/g | Number of pathogenic bacteria, mln/g | Portion of pathogenic bacteria, % |
|-------------------------|---------------------------------|--------------------------------------|-----------------------------------|
| 2                       | 15.3                            | 4.1                                  | 27                                |
| 10                      | 8.4                             | 2.0                                  | 24                                |
| 30                      | 3.0                             | 0.5                                  | 17                                |
| 50                      | 3.6                             | 0.8                                  | 22                                |
