# Supplementary material for: Phylloplane Biodiversity and Activity in the City at Different Distances from the Traffic Pollution Source
Source: Plants (Basel). 2022 Jan 31;11(3):402. doi: 10.3390/plants11030402 (PMC8839900; doi:10.3390/plants11030402)
Supplement: Supplementary file 1 [file plants-11-00402-s001.zip › Tables S3_S4.xlsx]

## Sheet: Table S3
Table S3 The abundance (operational taxonomic units, OTUs) and relative abundance (%) of bacteria of dust collected from the leaf surface at different distances to the road (2, 10, 30, 50 m)
						Abundance, OTUs					Relative abundance, %
Phylum	Class	Order	Family	Genus	Species	2 m	10 m	30 m	50 m		2 m	10 m	30 m	50 m
Acidobacteria	Acidobacteriia	Acidobacteriales	Acidobacteriaceae	Terriglobus	Terriglobus aquaticus	0	0	19	223		0	0	0.0279696	0.277878
Actinobacteria	Actinobacteria	Corynebacteriales	Nocardiaceae	Rhodococcus	Rhodococcus erythropolis	0	0	46	0		0	0	0.0677158	0
Actinobacteria	Actinobacteria	Jatrophihabitantales	Jatrophihabitantaceae	Jatrophihabitans	Jatrophihabitans sp.	0	0	24	21		0	0	0.03533	0.0261679
Actinobacteria	Actinobacteria	Micromonosporales	Micromonosporaceae	Micromonospora	Micromonospora sp.	0	0	63	26		0	0	0.0927412	0.0323984
Actinobacteria	Thermoleophilia	Solirubrobacterales	Patulibacteraceae	Patulibacter	Patulibacter minatonensis	0	0	0	67		0	0	0	0.0834881
Bacteroidetes	Chitinophagia	Chitinophagales	Chitinophagaceae	Panacibacter	unkn. Panacibacter(g)	0	0	48	20		0	0	0.0706599	0.0249218
Bacteroidetes	Cytophagia	Cytophagales	Cytophagaceae	Spirosoma	Spirosoma flavum	0	1	11	27		0	0.00147291	0.0161929	0.0336444
Bacteroidetes	Cytophagia	Cytophagales	Hymenobacteraceae	Siccationidurans	Siccationidurans occulans	0	4	114	151		0	0.00589162	0.167817	0.18816
Bacteroidetes	Sphingobacteriia	Sphingobacteriales	Sphingobacteriaceae	Mucilaginibacter	Mucilaginibacter glaciei	0	35	1	2		0	0.0515517	0.00147208	0.00249218
Bacteroidetes	Sphingobacteriia	Sphingobacteriales	Sphingobacteriaceae	Pedobacter	Pedobacter sp. M0-57	0	28	0	0		0	0.0412414	0	0
Bacteroidetes	Sphingobacteriia	Sphingobacteriales	Sphingobacteriaceae	unkn. Sphingobacteriaceae(f)	Sphingobacteriaceae bacterium 001xTSA12A_F01	0	47	0	0		0	0.0692266	0	0
Proteobacteria	Alphaproteobacteria	Rhizobiales	Methylobacteriaceae	Methylobacterium	Methylobacterium goesingense	0	0	38	0		0	0	0.0559391	0
Proteobacteria	Alphaproteobacteria	Rhizobiales	Methylobacteriaceae	Methylobacterium	Methylobacterium haplocladii	0	0	0	230		0	0	0	0.286601
Proteobacteria	Alphaproteobacteria	Rhizobiales	Roseiarcaceae	Roseiarcus	unkn. Roseiarcus(g)	0	5	33	67		0	0.00736453	0.0485787	0.0834881
Proteobacteria	Alphaproteobacteria	Rhizobiales	unkn. Rhizobiales(o)	unkn. Rhizobiales(o)	Rhizobiales bacterium KVD-1959-05	0	0	0	45		0	0	0	0.0560741
Proteobacteria	Alphaproteobacteria	Rickettsiales	Anaplasmataceae	Wolbachia	unkn. Wolbachia(g)	0	109	3	1		0	0.160547	0.00441625	0.00124609
Proteobacteria	Alphaproteobacteria	Sphingomonadales	Sphingomonadaceae	Sphingomonas	Sphingomonas sp. 44/40	0	0	180	0		0	0	0.264975	0
Proteobacteria	Alphaproteobacteria	Sphingomonadales	Sphingomonadaceae	Sphingosinicella	Sphingosinicella humi	0	1	25	6		0	0.00147291	0.036802	0.00747654
Proteobacteria	Betaproteobacteria	Burkholderiales	Oxalobacteraceae	Oxalicibacterium	unkn. Oxalicibacterium(g)	0	4	0	160		0	0.00589162	0	0.199374
Proteobacteria	Betaproteobacteria	Burkholderiales	unkn. Burkholderiales(o)	Xylophilus	Xylophilus sp.	0	99	23	1		0	0.145818	0.0338579	0.00124609
Proteobacteria	Deltaproteobacteria	Myxococcales	Archangiaceae	Cystobacter	Cystobacter fuscus	0	118	22	7		0	0.173803	0.0323858	0.00872263
Proteobacteria	Gammaproteobacteria	Enterobacterales	Enterobacteriaceae	Leclercia	Leclercia adecarboxylata	0	0	7	25		0	0	0.0103046	0.0311523
Proteobacteria	Gammaproteobacteria	Enterobacterales	Enterobacteriaceae	unkn. Enterobacteriaceae(f)	secondary symbiont type-T of Periphyllus bulgaricus	0	60	0	0		0	0.0883744	0	0
Proteobacteria	Gammaproteobacteria	Enterobacterales	Erwiniaceae	Erwinia	Erwinia rhapontici	0	0	5	84		0	0	0.00736041	0.104672
Proteobacteria	Gammaproteobacteria	Enterobacterales	Erwiniaceae	Erwinia	Erwinia sp. B144	0	0	0	70		0	0	0	0.0872263
Proteobacteria	Gammaproteobacteria	Enterobacterales	Morganellaceae	Moellerella	Moellerella wisconsensis	0	0	73	0		0	0	0.107462	0
Proteobacteria	Gammaproteobacteria	Enterobacterales	Morganellaceae	Providencia	Providencia burhodogranariea	0	0	0	145		0	0	0	0.180683
Proteobacteria	Gammaproteobacteria	Enterobacterales	Yersiniaceae	Rahnella	unkn. Rahnella(g)	0	41	3	18		0	0.0603891	0.00441625	0.0224296
Proteobacteria	Gammaproteobacteria	Enterobacterales	Yersiniaceae	Serratia	Serratia fonticola	0	0	3	30		0	0	0.00441625	0.0373827
Proteobacteria	Gammaproteobacteria	Enterobacterales	Yersiniaceae	Serratia	Serratia sp. mixed culture J2-44	0	3	28	0		0	0.00441872	0.0412183	0
Proteobacteria	Gammaproteobacteria	Pseudomonadales	Pseudomonadaceae	Pseudomonas	Pseudomonas abietaniphila	0	5	42	21		0	0.00736453	0.0618274	0.0261679
unkn. Bacteria(d)	unkn. Bacteria(d)	unkn. Bacteria(d)	unkn. Bacteria(d)	unkn. Bacteria(d)	bacterium 15M	0	565	0	0		0	0.832192	0	0
Actinobacteria	Actinobacteria	Geodermatophilales	Geodermatophilaceae	Geodermatophilus	Geodermatophilus sp.	1	0	52	74		0.00072989	0	0.0765483	0.0922107
Actinobacteria	Actinobacteria	Micrococcales	Microbacteriaceae	Subtercola	Subtercola boreus	1	31	46	82		0.00072989	0.0456601	0.0677158	0.102179
Bacteroidetes	Cytophagia	Cytophagales	Cytophagaceae	Spirosoma	Spirosoma endophyticum	1	9	12	11		0.00072989	0.0132562	0.017665	0.013707
Bacteroidetes	Cytophagia	Cytophagales	Hymenobacteraceae	Hymenobacter	Hymenobacter sp. PAMC 26628	1	3	11	45		0.00072989	0.00441872	0.0161929	0.0560741
Bacteroidetes	Sphingobacteriia	Sphingobacteriales	Sphingobacteriaceae	Mucilaginibacter	Mucilaginibacter lutimaris	1	21	4	3		0.00072989	0.030931	0.00588833	0.00373827
Proteobacteria	Alphaproteobacteria	Rhizobiales	Methylocystaceae	Methylocystis	Methylocystis sp. Pao66	1	7	218	224		0.00072989	0.0103103	0.320914	0.279124
Proteobacteria	Alphaproteobacteria	Rhizobiales	unkn. Rhizobiales(o)	unkn. Rhizobiales(o)	Rhizobiales bacterium	1	0	16	19		0.00072989	0	0.0235533	0.0236757
Proteobacteria	Alphaproteobacteria	Rhodospirillales	Acetobacteraceae	Lichenicola	Lichenicola sp.	1	2	5	38		0.00072989	0.00294581	0.00736041	0.0473514
Proteobacteria	Alphaproteobacteria	Sphingomonadales	Erythrobacteraceae	Erythromicrobium	Erythromicrobium sp. S23436	1	10	21	20		0.00072989	0.0147291	0.0309137	0.0249218
Proteobacteria	Betaproteobacteria	Burkholderiales	Oxalobacteraceae	Massilia	Massilia plicata	1	30	17	0		0.00072989	0.0441872	0.0250254	0
Proteobacteria	Gammaproteobacteria	Enterobacterales	Erwiniaceae	Pantoea	Pantoea ananatis	1	3	4	42		0.00072989	0.00441872	0.00588833	0.0523358
Proteobacteria	Gammaproteobacteria	Enterobacterales	Yersiniaceae	unkn. Yersiniaceae(f)	unkn. Yersiniaceae(f)	1	1005	65	85		0.00072989	1.48027	0.0956853	0.105918
Proteobacteria	Gammaproteobacteria	Legionellales	unkn. Legionellales(o)	unkn. Legionellales(o)	unkn. Legionellales(o)	1	0	2	140		0.00072989	0	0.00294416	0.174453
Proteobacteria	Gammaproteobacteria	Pseudomonadales	Pseudomonadaceae	Pseudomonas	Pseudomonas syringae	1	6	17	6		0.00072989	0.00883744	0.0250254	0.00747654
Proteobacteria	Alphaproteobacteria	Sphingomonadales	Sphingomonadaceae	Sphingomonas	Sphingomonas sp. G1	2	4	24	26		0.00145978	0.00589162	0.03533	0.0323984
Proteobacteria	Betaproteobacteria	Burkholderiales	Comamonadaceae	Acidovorax	Acidovorax sp. KBT005	2	4	9	52		0.00145978	0.00589162	0.0132487	0.0647967
Proteobacteria	Deltaproteobacteria	Desulfuromonadales	Geobacteraceae	Geobacter	unkn. Geobacter(g)	2	5	5	80		0.00145978	0.00736453	0.00736041	0.0996872
Tenericutes	Mollicutes	Acholeplasmatales	Acholeplasmataceae	Candidatus Phytoplasma	'Ziziphus rotundifolia' witches'-broom phytoplasma	2	1657	445	1382		0.00145978	2.44061	0.655076	1.7221
Verrucomicrobia	unkn. Verrucomicrobia(p)	unkn. Verrucomicrobia(p)	unkn. Verrucomicrobia(p)	unkn. Verrucomicrobia(p)	unkn. Verrucomicrobia(p)	2	2	9	30		0.00145978	0.00294581	0.0132487	0.0373827
Actinobacteria	Actinobacteria	Micromonosporales	Micromonosporaceae	Micromonospora	unkn. Micromonospora(g)	3	0	46	7		0.00218967	0	0.0677158	0.00872263
Actinobacteria	Thermoleophilia	Solirubrobacterales	Patulibacteraceae	Patulibacter	unkn. Patulibacter(g)	3	0	42	219		0.00218967	0	0.0618274	0.272894
Bacteroidetes	Cytophagia	Cytophagales	Hymenobacteraceae	Hymenobacter	Hymenobacter sp. DS-5PS-1	3	0	7	36		0.00218967	0	0.0103046	0.0448593
Cyanobacteria	unkn. Cyanobacteria(p)	Spirulinales	Spirulinaceae	Halospirulina	Halospirulina sp. EA11(2012)	3	11	6	14		0.00218967	0.016202	0.00883249	0.0174453
Proteobacteria	Alphaproteobacteria	Rhizobiales	Methylocystaceae	Methylocystis	unkn. Methylocystis(g)	3	1	188	219		0.00218967	0.00147291	0.276751	0.272894
Proteobacteria	Alphaproteobacteria	Sphingomonadales	Sphingomonadaceae	Sphingomonas	Sphingomonas kwangyangensis	3	0	2	45		0.00218967	0	0.00294416	0.0560741
Proteobacteria	Deltaproteobacteria	Myxococcales	Archangiaceae	Melittangium	Melittangium lichenicola	3	21	5	83		0.00218967	0.030931	0.00736041	0.103426
Proteobacteria	Gammaproteobacteria	Pseudomonadales	Pseudomonadaceae	Pseudomonas	Pseudomonas graminis	3	7	20	18		0.00218967	0.0103103	0.0294416	0.0224296
Acidobacteria	Acidobacteriia	Acidobacteriales	Acidobacteriaceae	unkn. Acidobacteriaceae(f)	unkn. Acidobacteriaceae(f)	4	3	21	18		0.00291956	0.00441872	0.0309137	0.0224296
Actinobacteria	Actinobacteria	Actinomycetales	unkn. Actinomycetales(o)	unkn. Actinomycetales(o)	unkn. Actinomycetales(o)	4	1	15	12		0.00291956	0.00147291	0.0220812	0.0149531
Actinobacteria	Actinobacteria	Micromonosporales	Micromonosporaceae	unkn. Micromonosporaceae(f)	unkn. Micromonosporaceae(f)	4	9	159	38		0.00291956	0.0132562	0.234061	0.0473514
Actinobacteria	Actinobacteria	Nakamurellales	Nakamurellaceae	Nakamurella	Nakamurella sp. PSY079	4	15	75	39		0.00291956	0.0220936	0.110406	0.0485975
Bacteroidetes	Cytophagia	Cytophagales	Hymenobacteraceae	Hymenobacter	Hymenobacter sp. UV11	4	6	10	33		0.00291956	0.00883744	0.0147208	0.041121
Proteobacteria	Betaproteobacteria	Burkholderiales	Oxalobacteraceae	Herbaspirillum	unkn. Herbaspirillum(g)	4	17	2	35		0.00291956	0.0250394	0.00294416	0.0436132
Proteobacteria	Oligoflexia	Bacteriovoracales	Bacteriovoracaceae	unkn. Bacteriovoracaceae(f)	Bacteriovoracaceae bacterium enrichment culture clone MRBiofilm-S-10H	4	3	13	98		0.00291956	0.00441872	0.0191371	0.122117
Actinobacteria	Actinobacteria	Kineosporiales	Kineosporiaceae	Kineococcus	Kineococcus radiotolerans	5	203	3	19		0.00364945	0.299	0.00441625	0.0236757
Actinobacteria	Thermoleophilia	Solirubrobacterales	Patulibacteraceae	Patulibacter	Patulibacter sp. R16	5	4	88	1		0.00364945	0.00589162	0.129543	0.00124609
Proteobacteria	Oligoflexia	Bacteriovoracales	Bacteriovoracaceae	unkn. Bacteriovoracaceae(f)	unkn. Bacteriovoracaceae(f)	5	0	15	46		0.00364945	0	0.0220812	0.0573202
Proteobacteria	Alphaproteobacteria	Rhizobiales	Beijerinckiaceae	unkn. Beijerinckiaceae(f)	unkn. Beijerinckiaceae(f)	6	0	18	9		0.00437934	0	0.0264975	0.0112148
Proteobacteria	Alphaproteobacteria	Rhizobiales	unkn. Rhizobiales(o)	unkn. Rhizobiales(o)	Rhizobiales bacterium Ume16	6	0	32	3		0.00437934	0	0.0471066	0.00373827
Proteobacteria	Alphaproteobacteria	Sphingomonadales	Sphingomonadaceae	Sphingomonas	Sphingomonas glacialis	6	31	314	551		0.00437934	0.0456601	0.462234	0.686596
Proteobacteria	Betaproteobacteria	Burkholderiales	Comamonadaceae	Acidovorax	unkn. Acidovorax(g)	6	5	17	32		0.00437934	0.00736453	0.0250254	0.0398749
Proteobacteria	Betaproteobacteria	Burkholderiales	Oxalobacteraceae	Massilia	Massilia lurida	6	36	13	33		0.00437934	0.0530246	0.0191371	0.041121
Tenericutes	Mollicutes	Acholeplasmatales	unkn. Acholeplasmatales(o)	unkn. Acholeplasmatales(o)	unkn. Acholeplasmatales(o)	6	38	17	27		0.00437934	0.0559704	0.0250254	0.0336444
Bacteroidetes	Cytophagia	Cytophagales	Hymenobacteraceae	Hymenobacter	Hymenobacter marinus	7	6	22	37		0.00510923	0.00883744	0.0323858	0.0461053
Bacteroidetes	Sphingobacteriia	Sphingobacteriales	Sphingobacteriaceae	Pedobacter	Pedobacter cryoconitis	7	54	0	0		0.00510923	0.0795369	0	0
Firmicutes	Bacilli	Lactobacillales	Enterococcaceae	Enterococcus	Enterococcus quebecensis	7	64	0	0		0.00510923	0.094266	0	0
Proteobacteria	Alphaproteobacteria	Rickettsiales	Rickettsiaceae	Candidatus Trichorickettsia	unkn. Candidatus Trichorickettsia(g)	7	1	18	15		0.00510923	0.00147291	0.0264975	0.0186914
Proteobacteria	Betaproteobacteria	Burkholderiales	unkn. Burkholderiales(o)	Rhizobacter	unkn. Rhizobacter(g)	7	10	12	46		0.00510923	0.0147291	0.017665	0.0573202
Planctomycetes	Planctomycetia	Isosphaerales	Isosphaeraceae	unkn. Isosphaeraceae(f)	unkn. Isosphaeraceae(f)	8	7	19	16		0.00583912	0.0103103	0.0279696	0.0199374
Proteobacteria	Betaproteobacteria	Burkholderiales	Comamonadaceae	Variovorax	Variovorax sp. PDD-69b-8	8	86	10	0		0.00583912	0.12667	0.0147208	0
Actinobacteria	Actinobacteria	Micrococcales	Microbacteriaceae	Amnibacterium	unkn. Amnibacterium(g)	9	9	19	27		0.00656901	0.0132562	0.0279696	0.0336444
Actinobacteria	Actinobacteria	Propionibacteriales	Propionibacteriaceae	unkn. Propionibacteriaceae(f)	Propionibacteriaceae bacterium Pao16	9	9	12	13		0.00656901	0.0132562	0.017665	0.0161992
Candidatus Saccharibacteria	unkn. Candidatus Saccharibacteria(p)	unkn. Candidatus Saccharibacteria(p)	unkn. Candidatus Saccharibacteria(p)	unkn. Candidatus Saccharibacteria(p)	unkn. Candidatus Saccharibacteria(p)	9	515	8	8		0.00656901	0.758547	0.0117767	0.00996872
Proteobacteria	Alphaproteobacteria	Rhodospirillales	Acetobacteraceae	Gluconacetobacter	unkn. Gluconacetobacter(g)	9	12	49	140		0.00656901	0.0176749	0.072132	0.174453
Tenericutes	Mollicutes	unkn. Mollicutes(c)	unkn. Mollicutes(c)	unkn. Mollicutes(c)	unkn. Mollicutes(c)	9	20	9	25		0.00656901	0.0294581	0.0132487	0.0311523
Tenericutes	unkn. Tenericutes(p)	unkn. Tenericutes(p)	unkn. Tenericutes(p)	unkn. Tenericutes(p)	unkn. Tenericutes(p)	9	14	10	30		0.00656901	0.0206207	0.0147208	0.0373827
Bacteroidetes	Cytophagia	Cytophagales	Hymenobacteraceae	Hymenobacter	Hymenobacter sp. 14-57-B6	10	17	38	29		0.0072989	0.0250394	0.0559391	0.0361366
Bacteroidetes	Sphingobacteriia	Sphingobacteriales	Sphingobacteriaceae	Mucilaginibacter	Mucilaginibacter terrae	10	7	24	24		0.0072989	0.0103103	0.03533	0.0299062
Proteobacteria	Alphaproteobacteria	Sphingomonadales	Sphingomonadaceae	Sphingomonas	Sphingomonas sp. Emb4	10	5	2	43		0.0072989	0.00736453	0.00294416	0.0535819
Bacteroidetes	Cytophagia	Cytophagales	Hymenobacteraceae	Hymenobacter	Hymenobacter sp. R-36499	12	0	14	68		0.00875868	0	0.0206091	0.0847341
Chlamydiae	Chlamydiia	Parachlamydiales	unkn. Parachlamydiales(o)	unkn. Parachlamydiales(o)	unkn. Parachlamydiales(o)	12	6	15	7		0.00875868	0.00883744	0.0220812	0.00872263
Proteobacteria	Betaproteobacteria	Burkholderiales	unkn. Burkholderiales(o)	Rhizobacter	Rhizobacter sp.	12	10	25	32		0.00875868	0.0147291	0.036802	0.0398749
Proteobacteria	Gammaproteobacteria	Enterobacterales	Erwiniaceae	Erwinia	Erwinia billingiae	12	53	112	27		0.00875868	0.078064	0.164873	0.0336444
Tenericutes	Mollicutes	Acholeplasmatales	Acholeplasmataceae	unkn. Acholeplasmataceae(f)	unkn. Acholeplasmataceae(f)	12	43	20	74		0.00875868	0.063335	0.0294416	0.0922107
Bacteroidetes	Flavobacteriia	Flavobacteriales	Flavobacteriaceae	Flavobacterium	unkn. Flavobacterium(g)	13	17	5	10		0.00948857	0.0250394	0.00736041	0.0124609
Actinobacteria	Actinobacteria	Micrococcales	Microbacteriaceae	Frigoribacterium	unkn. Frigoribacterium(g)	14	2	27	22		0.0102185	0.00294581	0.0397462	0.027414
Proteobacteria	Betaproteobacteria	Burkholderiales	unkn. Burkholderiales(o)	Xylophilus	Xylophilus ampelinus	14	5	5	73		0.0102185	0.00736453	0.00736041	0.0909646
Proteobacteria	Gammaproteobacteria	Pseudomonadales	Pseudomonadaceae	Pseudomonas	Pseudomonas sp. FS22-1	14	15	15	5		0.0102185	0.0220936	0.0220812	0.00623045
Actinobacteria	Actinobacteria	Propionibacteriales	Nocardioidaceae	Marmoricola	Marmoricola sp.	15	5	13	9		0.0109483	0.00736453	0.0191371	0.0112148
Chlamydiae	Chlamydiia	unkn. Chlamydiia(c)	unkn. Chlamydiia(c)	unkn. Chlamydiia(c)	unkn. Chlamydiia(c)	15	4	16	22		0.0109483	0.00589162	0.0235533	0.027414
Proteobacteria	Gammaproteobacteria	Xanthomonadales	unkn. Xanthomonadales(o)	unkn. Xanthomonadales(o)	unkn. Xanthomonadales(o)	15	20	0	2		0.0109483	0.0294581	0	0.00249218
Acidobacteria	Acidobacteriia	Acidobacteriales	Acidobacteriaceae	Terriglobus	unkn. Terriglobus(g)	16	9	34	101		0.0116782	0.0132562	0.0500508	0.125855
Actinobacteria	Actinobacteria	Actinomycetales	unkn. Actinomycetales(o)	unkn. Actinomycetales(o)	Actinomycetales bacterium	16	2	8	12		0.0116782	0.00294581	0.0117767	0.0149531
Bacteroidetes	Flavobacteriia	Flavobacteriales	Weeksellaceae	unkn. Weeksellaceae(f)	unkn. Weeksellaceae(f)	16	26	1	0		0.0116782	0.0382956	0.00147208	0
Bacteroidetes	Sphingobacteriia	Sphingobacteriales	Sphingobacteriaceae	Pedobacter	Pedobacter sp. CC9G2	16	229	0	3		0.0116782	0.337295	0	0.00373827
Proteobacteria	Alphaproteobacteria	Caulobacterales	Caulobacteraceae	unkn. Caulobacteraceae(f)	unkn. Caulobacteraceae(f)	16	1	20	7		0.0116782	0.00147291	0.0294416	0.00872263
Proteobacteria	Betaproteobacteria	Burkholderiales	Oxalobacteraceae	Duganella	Duganella sp.	16	90	21	62		0.0116782	0.132562	0.0309137	0.0772576
Abditibacteriota	Abditibacteria	unkn. Abditibacteria(c)	unkn. Abditibacteria(c)	unkn. Abditibacteria(c)	unkn. Abditibacteria(c)	17	2	13	17		0.0124081	0.00294581	0.0191371	0.0211835
Actinobacteria	Actinobacteria	Kineosporiales	Kineosporiaceae	Kineosporia	unkn. Kineosporia(g)	17	35	28	51		0.0124081	0.0515517	0.0412183	0.0635506
Actinobacteria	Actinobacteria	Pseudonocardiales	Pseudonocardiaceae	Actinomycetospora	Actinomycetospora sp.	18	10	48	16		0.013138	0.0147291	0.0706599	0.0199374
Proteobacteria	Alphaproteobacteria	Rickettsiales	Rickettsiaceae	Candidatus Trichorickettsia	Candidatus Trichorickettsia mobilis	18	0	17	28		0.013138	0	0.0250254	0.0348905
Actinobacteria	Actinobacteria	Kineosporiales	unkn. Kineosporiales(o)	unkn. Kineosporiales(o)	unkn. Kineosporiales(o)	19	2	8	12		0.0138679	0.00294581	0.0117767	0.0149531
Actinobacteria	Actinobacteria	Micrococcales	Microbacteriaceae	Curtobacterium	Curtobacterium sp.	19	9	34	39		0.0138679	0.0132562	0.0500508	0.0485975
Proteobacteria	Gammaproteobacteria	Legionellales	Legionellaceae	Legionella	unkn. Legionella(g)	19	13	7	14		0.0138679	0.0191478	0.0103046	0.0174453
unkn. Bacteria(d)	unkn. Bacteria(d)	unkn. Bacteria(d)	unkn. Bacteria(d)	unkn. Bacteria(d)	marine bacterium MSC10	19	17	11	22		0.0138679	0.0250394	0.0161929	0.027414
Proteobacteria	Alphaproteobacteria	Rickettsiales	Rickettsiaceae	Rickettsia	unkn. Rickettsia(g)	20	3	16	30		0.0145978	0.00441872	0.0235533	0.0373827
Proteobacteria	Betaproteobacteria	Burkholderiales	Oxalobacteraceae	Massilia	Massilia violaceinigra	21	42	1	1		0.0153277	0.061862	0.00147208	0.00124609
Proteobacteria	Gammaproteobacteria	Pseudomonadales	Pseudomonadaceae	Pseudomonas	Pseudomonas rhizosphaerae	21	15	11	12		0.0153277	0.0220936	0.0161929	0.0149531
Actinobacteria	Actinobacteria	Geodermatophilales	Geodermatophilaceae	Geodermatophilus	unkn. Geodermatophilus(g)	22	0	14	13		0.0160576	0	0.0206091	0.0161992
Planctomycetes	Planctomycetia	unkn. Planctomycetia(c)	unkn. Planctomycetia(c)	unkn. Planctomycetia(c)	unkn. Planctomycetia(c)	22	2	30	6		0.0160576	0.00294581	0.0441625	0.00747654
Proteobacteria	Betaproteobacteria	Burkholderiales	unkn. Burkholderiales(o)	Paucibacter	unkn. Paucibacter(g)	22	1	16	6		0.0160576	0.00147291	0.0235533	0.00747654
Bacteroidetes	Sphingobacteriia	unkn. Sphingobacteriia(c)	unkn. Sphingobacteriia(c)	unkn. Sphingobacteriia(c)	unkn. Sphingobacteriia(c)	23	58	13	16		0.0167875	0.0854285	0.0191371	0.0199374
Proteobacteria	Alphaproteobacteria	Rhizobiales	Rhizobiaceae	unkn. Rhizobiaceae(f)	unkn. Rhizobiaceae(f)	23	75	3	11		0.0167875	0.110468	0.00441625	0.013707
Proteobacteria	Gammaproteobacteria	Enterobacterales	Enterobacteriaceae	Klebsiella	unkn. Klebsiella(g)	23	9	33	10		0.0167875	0.0132562	0.0485787	0.0124609
Actinobacteria	Actinobacteria	Propionibacteriales	Nocardioidaceae	Marmoricola	unkn. Marmoricola(g)	25	3	14	2		0.0182472	0.00441872	0.0206091	0.00249218
Bacteroidetes	Sphingobacteriia	Sphingobacteriales	Sphingobacteriaceae	Albibacterium	unkn. Albibacterium(g)	25	12	11	0		0.0182472	0.0176749	0.0161929	0
Proteobacteria	Alphaproteobacteria	Rhizobiales	Methylobacteriaceae	Methylobacterium	Methylobacterium sp.	25	371	22	81		0.0182472	0.546448	0.0323858	0.100933
Proteobacteria	Betaproteobacteria	Burkholderiales	Oxalobacteraceae	Duganella	unkn. Duganella(g)	25	140	5	70		0.0182472	0.206207	0.00736041	0.0872263
Actinobacteria	Actinobacteria	Micrococcales	Microbacteriaceae	Amnibacterium	Amnibacterium sp.	26	31	47	145		0.0189771	0.0456601	0.0691879	0.180683
Actinobacteria	Actinobacteria	Pseudonocardiales	Pseudonocardiaceae	Actinomycetospora	unkn. Actinomycetospora(g)	26	11	31	11		0.0189771	0.016202	0.0456345	0.013707
Bacteroidetes	Sphingobacteriia	Sphingobacteriales	Sphingobacteriaceae	Pedobacter	Pedobacter sp. 01xTSA06A_A06	26	876	8	13		0.0189771	1.29027	0.0117767	0.0161992
Proteobacteria	Betaproteobacteria	Burkholderiales	Oxalobacteraceae	Noviherbaspirillum	unkn. Noviherbaspirillum(g)	26	1	6	24		0.0189771	0.00147291	0.00883249	0.0299062
Proteobacteria	Gammaproteobacteria	Enterobacterales	Erwiniaceae	Erwinia	Erwinia sp.	26	13	24	239		0.0189771	0.0191478	0.03533	0.297816
Cyanobacteria	unkn. Cyanobacteria(p)	Oscillatoriales	Oscillatoriaceae	Okeania	unkn. Okeania(g)	27	0	13	5		0.019707	0	0.0191371	0.00623045
Proteobacteria	Deltaproteobacteria	Myxococcales	Archangiaceae	unkn. Archangiaceae(f)	unkn. Archangiaceae(f)	27	4	5	23		0.019707	0.00589162	0.00736041	0.0286601
Proteobacteria	Betaproteobacteria	Burkholderiales	Oxalobacteraceae	unkn. Oxalobacteraceae(f)	Oxalobacteraceae bacterium CNRA01	29	10	0	19		0.0211668	0.0147291	0	0.0236757
Actinobacteria	Actinobacteria	Propionibacteriales	Nocardioidaceae	Friedmanniella	Friedmanniella sp. Ellin171	30	2	13	3		0.0218967	0.00294581	0.0191371	0.00373827
Bacteroidetes	Cytophagia	Cytophagales	Cytophagaceae	Spirosoma	Spirosoma sp.	30	0	255	165		0.0218967	0	0.375381	0.205605
unkn. Bacteria(d)	unkn. Bacteria(d)	unkn. Bacteria(d)	unkn. Bacteria(d)	unkn. Bacteria(d)	bacterium endosymbiont of Stereum hirsutum	33	6	11	3		0.0240864	0.00883744	0.0161929	0.00373827
Proteobacteria	Alphaproteobacteria	Holosporales	Caedimonadaceae	Caedimonas	unkn. Caedimonas(g)	34	17	91	72		0.0248163	0.0250394	0.133959	0.0897185
Bacteroidetes	Sphingobacteriia	Sphingobacteriales	unkn. Sphingobacteriales(o)	unkn. Sphingobacteriales(o)	unkn. Sphingobacteriales(o)	35	105	23	24		0.0255461	0.154655	0.0338579	0.0299062
Proteobacteria	Alphaproteobacteria	Rickettsiales	unkn. Rickettsiales(o)	unkn. Rickettsiales(o)	unkn. Rickettsiales(o)	35	7	58	48		0.0255461	0.0103103	0.0853808	0.0598123
Proteobacteria	Alphaproteobacteria	Rhizobiales	Beijerinckiaceae	Beijerinckia	unkn. Beijerinckia(g)	36	2	139	28		0.026276	0.00294581	0.204619	0.0348905
Armatimonadetes	unkn. Armatimonadetes(p)	unkn. Armatimonadetes(p)	unkn. Armatimonadetes(p)	unkn. Armatimonadetes(p)	unkn. Armatimonadetes(p)	37	4	21	40		0.0270059	0.00589162	0.0309137	0.0498436
Proteobacteria	Betaproteobacteria	Burkholderiales	Comamonadaceae	Variovorax	Variovorax sp.	37	0	12	397		0.0270059	0	0.017665	0.494698
Proteobacteria	Deltaproteobacteria	Myxococcales	Archangiaceae	Cystobacter	unkn. Cystobacter(g)	37	62	20	1		0.0270059	0.0913202	0.0294416	0.00124609
Proteobacteria	Gammaproteobacteria	Xanthomonadales	Rhodanobacteraceae	unkn. Rhodanobacteraceae(f)	unkn. Rhodanobacteraceae(f)	37	41	0	0		0.0270059	0.0603891	0	0
Actinobacteria	Actinobacteria	Corynebacteriales	Nocardiaceae	Rhodococcus	unkn. Rhodococcus(g)	38	0	19	5		0.0277358	0	0.0279696	0.00623045
Proteobacteria	Betaproteobacteria	Burkholderiales	Comamonadaceae	Variovorax	Variovorax sp. PDD-63b-21	38	11	23	23		0.0277358	0.016202	0.0338579	0.0286601
Proteobacteria	Alphaproteobacteria	Sphingomonadales	Sphingomonadaceae	Sphingomonas	Sphingomonas echinoides	39	6	9	14		0.0284657	0.00883744	0.0132487	0.0174453
Bacteroidetes	Cytophagia	Cytophagales	Cytophagaceae	unkn. Cytophagaceae(f)	unkn. Cytophagaceae(f)	41	18	51	78		0.0299255	0.0265123	0.0750762	0.0971951
Proteobacteria	Alphaproteobacteria	Rhodospirillales	Acetobacteraceae	unkn. Acetobacteraceae(f)	Acetobacteraceae bacterium	41	24	170	224		0.0299255	0.0353497	0.250254	0.279124
Actinobacteria	Actinobacteria	Micrococcales	unkn. Micrococcales(o)	unkn. Micrococcales(o)	unkn. Micrococcales(o)	43	6	18	30		0.0313853	0.00883744	0.0264975	0.0373827
Bacteroidetes	Chitinophagia	Chitinophagales	Chitinophagaceae	Segetibacter	unkn. Segetibacter(g)	43	5	102	3		0.0313853	0.00736453	0.150152	0.00373827
Planctomycetes	Planctomycetia	Planctomycetales	unkn. Planctomycetales(o)	unkn. Planctomycetales(o)	unkn. Planctomycetales(o)	44	0	32	16		0.0321151	0	0.0471066	0.0199374
Proteobacteria	Oligoflexia	Bdellovibrionales	Bdellovibrionaceae	Bdellovibrio	unkn. Bdellovibrio(g)	45	4	22	17		0.032845	0.00589162	0.0323858	0.0211835
Proteobacteria	Gammaproteobacteria	Pseudomonadales	Pseudomonadaceae	Pseudomonas	Pseudomonas viridiflava	46	88	65	47		0.0335749	0.129616	0.0956853	0.0585662
Proteobacteria	Alphaproteobacteria	Rhodobacterales	Rhodobacteraceae	unkn. Rhodobacteraceae(f)	unkn. Rhodobacteraceae(f)	47	0	4	1		0.0343048	0	0.00588833	0.00124609
Proteobacteria	Alphaproteobacteria	Sphingomonadales	Sphingomonadaceae	Sphingomonas	Sphingomonas sp. LBS8	47	0	1	5		0.0343048	0	0.00147208	0.00623045
Actinobacteria	Actinobacteria	Kineosporiales	Kineosporiaceae	unkn. Kineosporiaceae(f)	unkn. Kineosporiaceae(f)	48	31	27	22		0.0350347	0.0456601	0.0397462	0.027414
Proteobacteria	Alphaproteobacteria	Rhizobiales	Methylobacteriaceae	Methylobacterium	Methylobacterium sp. AG46	48	5	7	1		0.0350347	0.00736453	0.0103046	0.00124609
Actinobacteria	Actinobacteria	Nakamurellales	Nakamurellaceae	Nakamurella	unkn. Nakamurella(g)	49	6	24	18		0.0357646	0.00883744	0.03533	0.0224296
Proteobacteria	Gammaproteobacteria	Enterobacterales	Erwiniaceae	Pantoea	Pantoea sp.	50	48	35	0		0.0364945	0.0706995	0.0515229	0
Actinobacteria	Actinobacteria	Propionibacteriales	Nocardioidaceae	unkn. Nocardioidaceae(f)	unkn. Nocardioidaceae(f)	51	4	30	11		0.0372244	0.00589162	0.0441625	0.013707
Tenericutes	Mollicutes	Acholeplasmatales	Acholeplasmataceae	Candidatus Phytoplasma	unkn. Candidatus Phytoplasma(g)	51	170	63	164		0.0372244	0.250394	0.0927412	0.204359
Bacteroidetes	Cytophagia	Cytophagales	Cytophagaceae	Spirosoma	Spirosoma sp. II_Gauze_A_2_12	52	31	68	70		0.0379543	0.0456601	0.100102	0.0872263
Actinobacteria	Actinobacteria	Geodermatophilales	Geodermatophilaceae	Blastococcus	Blastococcus sp.	53	2	0	0		0.0386842	0.00294581	0	0
Abditibacteriota	Abditibacteria	Abditibacteriales	Abitibacteriaceae	Abditibacterium	Abditibacterium utsteinense	54	4	38	26		0.039414	0.00589162	0.0559391	0.0323984
Actinobacteria	Actinobacteria	Propionibacteriales	Nocardioidaceae	Friedmanniella	unkn. Friedmanniella(g)	54	72	298	23		0.039414	0.106049	0.43868	0.0286601
Proteobacteria	Alphaproteobacteria	Rickettsiales	Rickettsiaceae	unkn. Rickettsiaceae(f)	unkn. Rickettsiaceae(f)	57	10	61	85		0.0416037	0.0147291	0.089797	0.105918
Actinobacteria	Actinobacteria	Micrococcales	Microbacteriaceae	Frondihabitans	Frondihabitans sp.	58	22	7	8		0.0423336	0.0324039	0.0103046	0.00996872
Abditibacteriota	Abditibacteria	Abditibacteriales	Abitibacteriaceae	unkn. Abitibacteriaceae(f)	unkn. Abitibacteriaceae(f)	59	2	8	3		0.0430635	0.00294581	0.0117767	0.00373827
Actinobacteria	Actinobacteria	Propionibacteriales	unkn. Propionibacteriales(o)	unkn. Propionibacteriales(o)	unkn. Propionibacteriales(o)	59	2	5	68		0.0430635	0.00294581	0.00736041	0.0847341
Firmicutes	unkn. Firmicutes(p)	unkn. Firmicutes(p)	unkn. Firmicutes(p)	unkn. Firmicutes(p)	unkn. Firmicutes(p)	59	9	14	18		0.0430635	0.0132562	0.0206091	0.0224296
Bacteroidetes	Chitinophagia	Chitinophagales	Chitinophagaceae	unkn. Chitinophagaceae(f)	unkn. Chitinophagaceae(f)	60	2	22	11		0.0437934	0.00294581	0.0323858	0.013707
Bacteroidetes	Cytophagia	Cytophagales	Cytophagaceae	Spirosoma	Spirosoma lituiforme	60	5	101	66		0.0437934	0.00736453	0.14868	0.082242
Bacteroidetes	Cytophagia	Cytophagales	Hymenobacteraceae	Hymenobacter	Hymenobacter polaris	63	15	81	118		0.0459831	0.0220936	0.119239	0.147039
Proteobacteria	Alphaproteobacteria	Rhodospirillales	unkn. Rhodospirillales(o)	unkn. Rhodospirillales(o)	unkn. Rhodospirillales(o)	64	20	62	73		0.0467129	0.0294581	0.0912691	0.0909646
Proteobacteria	Betaproteobacteria	Burkholderiales	Burkholderiaceae	unkn. Burkholderiaceae(f)	unkn. Burkholderiaceae(f)	67	12	4	11		0.0489026	0.0176749	0.00588833	0.013707
Deinococcus-Thermus	Deinococci	Deinococcales	Deinococcaceae	Deinococcus	Deinococcus sp.	68	6	49	74		0.0496325	0.00883744	0.072132	0.0922107
Proteobacteria	Gammaproteobacteria	Pseudomonadales	unkn. Pseudomonadales(o)	unkn. Pseudomonadales(o)	unkn. Pseudomonadales(o)	68	37	102	147		0.0496325	0.0544975	0.150152	0.183175
Actinobacteria	Actinobacteria	Geodermatophilales	Geodermatophilaceae	Blastococcus	unkn. Blastococcus(g)	69	2	4	0		0.0503624	0.00294581	0.00588833	0
Proteobacteria	Gammaproteobacteria	Enterobacterales	Pectobacteriaceae	Pectobacterium	Pectobacterium carotovorum	75	5	6	6		0.0547417	0.00736453	0.00883249	0.00747654
Proteobacteria	Deltaproteobacteria	Myxococcales	unkn. Myxococcales(o)	unkn. Myxococcales(o)	unkn. Myxococcales(o)	76	12	22	36		0.0554716	0.0176749	0.0323858	0.0448593
Cyanobacteria	unkn. Cyanobacteria(p)	Synechococcales	unkn. Synechococcales(o)	unkn. Synechococcales(o)	unkn. Synechococcales(o)	77	49	93	101		0.0562015	0.0721724	0.136904	0.125855
Verrucomicrobia	Spartobacteria	unkn. Spartobacteria(c)	unkn. Spartobacteria(c)	unkn. Spartobacteria(c)	unkn. Spartobacteria(c)	77	1	70	39		0.0562015	0.00147291	0.103046	0.0485975
Actinobacteria	Actinobacteria	Propionibacteriales	Nocardioidaceae	Nocardioides	unkn. Nocardioides(g)	79	11	42	57		0.0576613	0.016202	0.0618274	0.0710272
Proteobacteria	Alphaproteobacteria	Rhizobiales	Rhizobiaceae	Rhizobium	Rhizobium sp.	81	25	42	54		0.0591211	0.0368226	0.0618274	0.0672889
Proteobacteria	Betaproteobacteria	Burkholderiales	unkn. Burkholderiales(o)	Xylophilus	unkn. Xylophilus(g)	81	50	57	109		0.0591211	0.0736453	0.0839087	0.135824
Proteobacteria	Gammaproteobacteria	Enterobacterales	Enterobacteriaceae	unkn. Enterobacteriaceae(f)	unkn. Enterobacteriaceae(f)	81	54	96	108		0.0591211	0.0795369	0.14132	0.134578
Proteobacteria	Betaproteobacteria	Burkholderiales	Oxalobacteraceae	Janthinobacterium	Janthinobacterium sp. CC13O	83	37	5	15		0.0605808	0.0544975	0.00736041	0.0186914
Proteobacteria	Betaproteobacteria	Burkholderiales	Oxalobacteraceae	Noviherbaspirillum	Noviherbaspirillum suwonense	83	0	5	0		0.0605808	0	0.00736041	0
Proteobacteria	Gammaproteobacteria	Enterobacterales	Enterobacteriaceae	Enterobacter	unkn. Enterobacter(g)	85	56	73	23		0.0620406	0.0824827	0.107462	0.0286601
Abditibacteriota	Abditibacteria	Abditibacteriales	unkn. Abditibacteriales(o)	unkn. Abditibacteriales(o)	unkn. Abditibacteriales(o)	86	3	41	63		0.0627705	0.00441872	0.0603554	0.0785037
Cyanobacteria	unkn. Cyanobacteria(p)	Spirulinales	Spirulinaceae	Halospirulina	unkn. Halospirulina(g)	86	18	17	26		0.0627705	0.0265123	0.0250254	0.0323984
Bacteroidetes	Cytophagia	Cytophagales	Hymenobacteraceae	Siccationidurans	unkn. Siccationidurans(g)	88	6	60	129		0.0642303	0.00883744	0.0883249	0.160746
Deinococcus-Thermus	Deinococci	Deinococcales	Deinococcaceae	Deinococcus	unkn. Deinococcus(g)	88	4	20	18		0.0642303	0.00589162	0.0294416	0.0224296
Planctomycetes	Phycisphaerae	Tepidisphaerales	Tepidisphaeraceae	Tepidisphaera	unkn. Tepidisphaera(g)	89	3	33	27		0.0649602	0.00441872	0.0485787	0.0336444
Proteobacteria	Alphaproteobacteria	Rhizobiales	Aurantimonadaceae	Aureimonas	Aureimonas sp.	89	2	0	14		0.0649602	0.00294581	0	0.0174453
Actinobacteria	unkn. Actinobacteria(p)	unkn. Actinobacteria(p)	unkn. Actinobacteria(p)	unkn. Actinobacteria(p)	unkn. Actinobacteria(p)	90	23	39	59		0.0656901	0.0338768	0.0574112	0.0735193
Proteobacteria	Alphaproteobacteria	Rhizobiales	Hyphomicrobiaceae	Devosia	unkn. Devosia(g)	91	5	11	4		0.06642	0.00736453	0.0161929	0.00498436
Actinobacteria	Actinobacteria	Micrococcales	Micrococcaceae	Arthrobacter	Arthrobacter agilis	92	0	0	2		0.0671499	0	0	0.00249218
Proteobacteria	Betaproteobacteria	Burkholderiales	Oxalobacteraceae	Janthinobacterium	unkn. Janthinobacterium(g)	94	56	7	42		0.0686096	0.0824827	0.0103046	0.0523358
unkn. Bacteria(d)	unkn. Bacteria(d)	unkn. Bacteria(d)	unkn. Bacteria(d)	unkn. Bacteria(d)	bacterium symbiont of Heliothrips haemorrhoidalis	99	103	36	81		0.0722591	0.151709	0.052995	0.100933
Bacteroidetes	Sphingobacteriia	Sphingobacteriales	Sphingobacteriaceae	Mucilaginibacter	Mucilaginibacter sp.	100	360	43	99		0.072989	0.530246	0.0632995	0.123363
Bacteroidetes	Sphingobacteriia	Sphingobacteriales	Sphingobacteriaceae	Mucilaginibacter	unkn. Mucilaginibacter(g)	102	123	292	164		0.0744488	0.181167	0.429848	0.204359
Proteobacteria	Betaproteobacteria	Burkholderiales	Comamonadaceae	unkn. Comamonadaceae(f)	unkn. Comamonadaceae(f)	105	24	385	65		0.0766384	0.0353497	0.566752	0.0809959
Proteobacteria	Alphaproteobacteria	Rhizobiales	Methylobacteriaceae	unkn. Methylobacteriaceae(f)	unkn. Methylobacteriaceae(f)	106	28	58	65		0.0773683	0.0412414	0.0853808	0.0809959
Proteobacteria	Alphaproteobacteria	Sphingomonadales	Sphingomonadaceae	Novosphingobium	unkn. Novosphingobium(g)	106	70	35	89		0.0773683	0.103103	0.0515229	0.110902
Proteobacteria	Betaproteobacteria	unkn. Betaproteobacteria(c)	unkn. Betaproteobacteria(c)	unkn. Betaproteobacteria(c)	beta proteobacterium TSBY-42	106	9	2	2		0.0773683	0.0132562	0.00294416	0.00249218
Bacteroidetes	Sphingobacteriia	Sphingobacteriales	Sphingobacteriaceae	Mucilaginibacter	Mucilaginibacter sp. PAMC 26640	107	48	88	567		0.0780982	0.0706995	0.129543	0.706533
Actinobacteria	Actinobacteria	Micrococcales	Microbacteriaceae	Frondihabitans	unkn. Frondihabitans(g)	108	14	112	30		0.0788281	0.0206207	0.164873	0.0373827
Actinobacteria	Actinobacteria	unkn. Actinobacteria(c)	unkn. Actinobacteria(c)	unkn. Actinobacteria(c)	Actinobacteria bacterium	111	94	2	13		0.0810178	0.138453	0.00294416	0.0161992
Firmicutes	Bacilli	Bacillales	Bacillaceae	Bacillus	unkn. Bacillus(g)	112	1	23	5		0.0817476	0.00147291	0.0338579	0.00623045
unkn. Bacteria(d)	unkn. Bacteria(d)	unkn. Bacteria(d)	unkn. Bacteria(d)	unkn. Bacteria(d)	bacterium	113	72	267	93		0.0824775	0.106049	0.393046	0.115886
Bacteroidetes	Sphingobacteriia	Sphingobacteriales	Sphingobacteriaceae	Mucilaginibacter	Mucilaginibacter galii	115	37	15	4		0.0839373	0.0544975	0.0220812	0.00498436
Proteobacteria	Alphaproteobacteria	Rhizobiales	Aurantimonadaceae	Aureimonas	Aureimonas psammosilene	115	1	9	3		0.0839373	0.00147291	0.0132487	0.00373827
Proteobacteria	Alphaproteobacteria	Rhodobacterales	Rhodobacteraceae	Paracoccus	Paracoccus sp.	121	0	0	0		0.0883167	0	0	0
Acidobacteria	Acidobacteriia	Acidobacteriales	Acidobacteriaceae	Terriglobus	Terriglobus roseus	123	36	15	61		0.0897764	0.0530246	0.0220812	0.0760115
Bacteroidetes	Cytophagia	Cytophagales	Cytophagaceae	Dyadobacter	Dyadobacter sp. TAP1-7_Pa	124	75	61	27		0.0905063	0.110468	0.089797	0.0336444
Proteobacteria	Alphaproteobacteria	Sphingomonadales	Sphingomonadaceae	Novosphingobium	Novosphingobium fluoreni	125	0	0	223		0.0912362	0	0	0.277878
Proteobacteria	Gammaproteobacteria	Pseudomonadales	Pseudomonadaceae	unkn. Pseudomonadaceae(f)	unkn. Pseudomonadaceae(f)	129	113	207	273		0.0941558	0.166438	0.304721	0.340183
Proteobacteria	Gammaproteobacteria	Enterobacterales	Erwiniaceae	Buchnera	unkn. Buchnera(g)	132	9	13	36		0.0963454	0.0132562	0.0191371	0.0448593
Proteobacteria	Alphaproteobacteria	Rhizobiales	unkn. Rhizobiales(o)	unkn. Rhizobiales(o)	unkn. Rhizobiales(o)	134	202	736	754		0.0978052	0.297527	1.08345	0.939552
Proteobacteria	Alphaproteobacteria	Sphingomonadales	unkn. Sphingomonadales(o)	unkn. Sphingomonadales(o)	unkn. Sphingomonadales(o)	135	46	53	93		0.0985351	0.0677537	0.0780203	0.115886
Proteobacteria	Gammaproteobacteria	Enterobacterales	Erwiniaceae	Buchnera	Buchnera aphidicola	135	5	17	35		0.0985351	0.00736453	0.0250254	0.0436132
Actinobacteria	Actinobacteria	Propionibacteriales	Nocardioidaceae	Marmoricola	Marmoricola scoriae	137	0	0	0		0.0999949	0	0	0
Firmicutes	Bacilli	Lactobacillales	Enterococcaceae	unkn. Enterococcaceae(f)	unkn. Enterococcaceae(f)	137	5	0	2		0.0999949	0.00736453	0	0.00249218
Actinobacteria	Actinobacteria	Micrococcales	Microbacteriaceae	Curtobacterium	unkn. Curtobacterium(g)	141	103	97	91		0.102914	0.151709	0.142792	0.113394
Proteobacteria	Gammaproteobacteria	Enterobacterales	Enterobacteriaceae	Candidatus Hamiltonella	unkn. Candidatus Hamiltonella(g)	141	0	0	5		0.102914	0	0	0.00623045
Proteobacteria	Betaproteobacteria	Burkholderiales	unkn. Burkholderiales(o)	Xylophilus	Xylophilus rhododendri	142	38	166	199		0.103644	0.0559704	0.244366	0.247972
Proteobacteria	Gammaproteobacteria	Pseudomonadales	Pseudomonadaceae	Pseudomonas	Pseudomonas sp.	152	75	120	142		0.110943	0.110468	0.17665	0.176945
Gemmatimonadetes	Longimicrobia	Longimicrobiales	unkn. Longimicrobiales(o)	unkn. Longimicrobiales(o)	unkn. Longimicrobiales(o)	158	1	0	0		0.115323	0.00147291	0	0
Bacteroidetes	Cytophagia	Cytophagales	Cytophagaceae	Spirosoma	Spirosoma linguale	160	4	0	0		0.116782	0.00589162	0	0
Proteobacteria	Betaproteobacteria	Burkholderiales	Burkholderiaceae	Burkholderia	unkn. Burkholderia(g)	163	82	8	27		0.118972	0.120778	0.0117767	0.0336444
Bacteroidetes	Cytophagia	unkn. Cytophagia(c)	unkn. Cytophagia(c)	unkn. Cytophagia(c)	unkn. Cytophagia(c)	170	21	93	173		0.124081	0.030931	0.136904	0.215574
Bacteroidetes	Cytophagia	Cytophagales	Cytophagaceae	Dyadobacter	unkn. Dyadobacter(g)	185	306	35	10		0.13503	0.450709	0.0515229	0.0124609
Actinobacteria	Actinobacteria	Micrococcales	Microbacteriaceae	unkn. Microbacteriaceae(f)	unkn. Microbacteriaceae(f)	188	43	166	465		0.137219	0.063335	0.244366	0.579432
Proteobacteria	Betaproteobacteria	Burkholderiales	Oxalobacteraceae	Massilia	Massilia brevitalea	197	475	13	22		0.143788	0.69963	0.0191371	0.027414
Proteobacteria	Alphaproteobacteria	Rhodospirillales	Acetobacteraceae	unkn. Acetobacteraceae(f)	Acetobacteraceae bacterium W1.09-37	198	358	582	506		0.144518	0.5273	0.856752	0.630522
Actinobacteria	Actinobacteria	Micrococcales	Microbacteriaceae	Subtercola	unkn. Subtercola(g)	203	3	31	48		0.148168	0.00441872	0.0456345	0.0598123
Actinobacteria	Actinobacteria	Propionibacteriales	Nocardioidaceae	Nocardioides	Nocardioides sp.	208	4	11	22		0.151817	0.00589162	0.0161929	0.027414
Proteobacteria	Gammaproteobacteria	Enterobacterales	Erwiniaceae	Erwinia	Erwinia amylovora	216	124	118	57		0.157656	0.18264	0.173706	0.0710272
Proteobacteria	Betaproteobacteria	Burkholderiales	Oxalobacteraceae	Massilia	Massilia sp. 2C4	222	11	8	18		0.162036	0.016202	0.0117767	0.0224296
Proteobacteria	Oligoflexia	unkn. Oligoflexia(c)	unkn. Oligoflexia(c)	unkn. Oligoflexia(c)	unkn. Oligoflexia(c)	223	24	23	49		0.162765	0.0353497	0.0338579	0.0610584
Bacteroidetes	unkn. Bacteroidetes(p)	unkn. Bacteroidetes(p)	unkn. Bacteroidetes(p)	unkn. Bacteroidetes(p)	unkn. Bacteroidetes(p)	233	254	162	228		0.170064	0.374118	0.238477	0.284109
Bacteroidetes	Cytophagia	Cytophagales	Hymenobacteraceae	Hymenobacter	Hymenobacter rivuli	239	3	7	4		0.174444	0.00441872	0.0103046	0.00498436
Actinobacteria	Actinobacteria	Propionibacteriales	Nocardioidaceae	Friedmanniella	Friedmanniella sp.	243	9	21	150		0.177363	0.0132562	0.0309137	0.186914
Firmicutes	Bacilli	Lactobacillales	Enterococcaceae	Enterococcus	Enterococcus faecalis	244	0	0	0		0.178093	0	0	0
Gemmatimonadetes	Longimicrobia	unkn. Longimicrobia(c)	unkn. Longimicrobia(c)	unkn. Longimicrobia(c)	unkn. Longimicrobia(c)	247	0	0	0		0.180283	0	0	0
Proteobacteria	Alphaproteobacteria	Rhodospirillales	Acetobacteraceae	Roseomonas	Roseomonas sp.	247	23	79	79		0.180283	0.0338768	0.116294	0.0984411
Proteobacteria	Gammaproteobacteria	Xanthomonadales	Rhodanobacteraceae	Luteibacter	Luteibacter sp. CC13G	249	275	0	7		0.181743	0.405049	0	0.00872263
Proteobacteria	Alphaproteobacteria	Rhizobiales	Beijerinckiaceae	Beijerinckia	Beijerinckia sp.	265	0	1184	0		0.193421	0	1.74295	0
Bacteroidetes	Sphingobacteriia	Sphingobacteriales	Sphingobacteriaceae	unkn. Sphingobacteriaceae(f)	unkn. Sphingobacteriaceae(f)	282	265	115	127		0.205829	0.39032	0.169289	0.158253
Bacteroidetes	Cytophagia	Cytophagales	unkn. Cytophagales(o)	unkn. Cytophagales(o)	unkn. Cytophagales(o)	294	41	163	241		0.214588	0.0603891	0.239949	0.300308
Proteobacteria	Gammaproteobacteria	Enterobacterales	Erwiniaceae	Pantoea	Pantoea agglomerans	300	37	52	21		0.218967	0.0544975	0.0765483	0.0261679
Bacteroidetes	Cytophagia	Cytophagales	Cytophagaceae	Spirosoma	unkn. Spirosoma(g)	305	47	259	430		0.222616	0.0692266	0.381269	0.535819
Proteobacteria	Gammaproteobacteria	Pseudomonadales	Pseudomonadaceae	Pseudomonas	Pseudomonas sp. MsC-13-1CB4-03	305	5	4	73		0.222616	0.00736453	0.00588833	0.0909646
Bacteroidetes	Cytophagia	Cytophagales	Hymenobacteraceae	Hymenobacter	Hymenobacter sp. PDD-54b-11	315	58	507	702		0.229915	0.0854285	0.746346	0.874755
Proteobacteria	Alphaproteobacteria	Rhizobiales	Rhizobiaceae	Rhizobium	unkn. Rhizobium(g)	317	710	7	17		0.231375	1.04576	0.0103046	0.0211835
Bacteroidetes	Flavobacteriia	Flavobacteriales	Weeksellaceae	Chryseobacterium	unkn. Chryseobacterium(g)	336	705	5	11		0.245243	1.0384	0.00736041	0.013707
Actinobacteria	Actinobacteria	Nakamurellales	Nakamurellaceae	Nakamurella	Nakamurella sp.	339	2	14	11		0.247433	0.00294581	0.0206091	0.013707
Proteobacteria	Alphaproteobacteria	Sphingomonadales	Sphingomonadaceae	Sphingomonas	Sphingomonas solaris	350	155	364	444		0.255461	0.2283	0.535838	0.553264
Proteobacteria	Alphaproteobacteria	unkn. Alphaproteobacteria(c)	unkn. Alphaproteobacteria(c)	unkn. Alphaproteobacteria(c)	unkn. Alphaproteobacteria(c)	352	114	203	273		0.256921	0.167911	0.298833	0.340183
Actinobacteria	Actinobacteria	Geodermatophilales	Geodermatophilaceae	unkn. Geodermatophilaceae(f)	unkn. Geodermatophilaceae(f)	404	17	15	14		0.294875	0.0250394	0.0220812	0.0174453
Bacteroidetes	Sphingobacteriia	Sphingobacteriales	Sphingobacteriaceae	Pedobacter	unkn. Pedobacter(g)	447	6058	115	191		0.326261	8.92286	0.169289	0.238003
Bacteroidetes	Cytophagia	Cytophagales	Hymenobacteraceae	Siccationidurans	Siccationidurans metalli	483	27	58	196		0.352537	0.0397685	0.0853808	0.244234
Firmicutes	Bacilli	unkn. Bacilli(c)	unkn. Bacilli(c)	unkn. Bacilli(c)	unkn. Bacilli(c)	495	3	2	7		0.361295	0.00441872	0.00294416	0.00872263
Proteobacteria	Alphaproteobacteria	Rhodospirillales	Acetobacteraceae	Roseomonas	unkn. Roseomonas(g)	509	7	63	24		0.371514	0.0103103	0.0927412	0.0299062
Proteobacteria	Gammaproteobacteria	Xanthomonadales	Rhodanobacteraceae	Luteibacter	unkn. Luteibacter(g)	550	817	0	4		0.401439	1.20336	0	0.00498436
Proteobacteria	Alphaproteobacteria	Sphingomonadales	Sphingomonadaceae	unkn. Sphingomonadaceae(f)	unkn. Sphingomonadaceae(f)	564	286	260	815		0.411658	0.421251	0.382741	1.01556
Proteobacteria	Gammaproteobacteria	Enterobacterales	unkn. Enterobacterales(o)	unkn. Enterobacterales(o)	unkn. Enterobacterales(o)	571	900	1354	979		0.416767	1.32562	1.9932	1.21992
Proteobacteria	Alphaproteobacteria	Sphingomonadales	Sphingomonadaceae	Novosphingobium	Novosphingobium sp.	638	211	79	271		0.46567	0.310783	0.116294	0.33769
Proteobacteria	Gammaproteobacteria	Enterobacterales	Erwiniaceae	unkn. Erwiniaceae(f)	unkn. Erwiniaceae(f)	650	260	677	236		0.474428	0.382956	0.996599	0.294077
Proteobacteria	Alphaproteobacteria	Sphingomonadales	Sphingomonadaceae	Sphingomonas	Sphingomonas sp. Pao59	657	134	127	125		0.479538	0.197369	0.186954	0.155761
Bacteroidetes	Cytophagia	Cytophagales	Hymenobacteraceae	Hymenobacter	Hymenobacter baengnokdamensis	662	6	124	289		0.483187	0.00883744	0.182538	0.36012
Proteobacteria	Alphaproteobacteria	Rhodobacterales	Rhodobacteraceae	Rubellimicrobium	unkn. Rubellimicrobium(g)	716	12	2	5		0.522601	0.0176749	0.00294416	0.00623045
Proteobacteria	Gammaproteobacteria	Enterobacterales	Erwiniaceae	Erwinia	unkn. Erwinia(g)	724	764	2773	744		0.52844	1.1253	4.08208	0.927091
Actinobacteria	Actinobacteria	unkn. Actinobacteria(c)	unkn. Actinobacteria(c)	unkn. Actinobacteria(c)	unkn. Actinobacteria(c)	744	159	72	477		0.543038	0.234192	0.10599	0.594385
Bacteroidetes	Sphingobacteriia	Sphingobacteriales	Sphingobacteriaceae	Daejeonella	unkn. Daejeonella(g)	759	133	601	716		0.553986	0.195896	0.884721	0.892201
Bacteroidetes	Cytophagia	Cytophagales	Hymenobacteraceae	Hymenobacter	Hymenobacter sp. Xue4	761	205	854	1730		0.555446	0.301946	1.25716	2.15574
Bacteroidetes	Cytophagia	Cytophagales	Hymenobacteraceae	Hymenobacter	Hymenobacter sp. MIC2056	768	78	377	731		0.560555	0.114887	0.554975	0.910892
Bacteroidetes	Sphingobacteriia	Sphingobacteriales	Sphingobacteriaceae	Pedobacter	Pedobacter sp.	768	297	133	160		0.560555	0.437453	0.195787	0.199374
Proteobacteria	Gammaproteobacteria	Enterobacterales	Enterobacteriaceae	Candidatus Hamiltonella	Candidatus Hamiltonella defensa	784	0	0	18		0.572234	0	0	0.0224296
Proteobacteria	Betaproteobacteria	Burkholderiales	Burkholderiaceae	Burkholderia	Burkholderia sp.	862	292	27	97		0.629165	0.430089	0.0397462	0.120871
Proteobacteria	Alphaproteobacteria	Sphingomonadales	Sphingomonadaceae	Sphingomonas	Sphingomonas sp.	876	592	894	629		0.639383	0.87196	1.31604	0.783791
Proteobacteria	Betaproteobacteria	unkn. Betaproteobacteria(c)	unkn. Betaproteobacteria(c)	unkn. Betaproteobacteria(c)	unkn. Betaproteobacteria(c)	912	326	65	209		0.665659	0.480167	0.0956853	0.260433
Proteobacteria	Betaproteobacteria	Burkholderiales	unkn. Burkholderiales(o)	unkn. Burkholderiales(o)	unkn. Burkholderiales(o)	926	428	274	298		0.675878	0.630404	0.40335	0.371335
Proteobacteria	Betaproteobacteria	Burkholderiales	unkn. Burkholderiales(o)	unkn. Burkholderiales(o)	Burkholderiales bacterium PDD-69b-30	1148	401	261	303		0.837913	0.590635	0.384213	0.377565
Proteobacteria	Alphaproteobacteria	Rhodospirillales	Acetobacteraceae	unkn. Acetobacteraceae(f)	unkn. Acetobacteraceae(f)	1194	431	1410	1252		0.871488	0.634822	2.07564	1.56011
Bacteroidetes	Cytophagia	Cytophagales	Hymenobacteraceae	unkn. Hymenobacteraceae(f)	unkn. Hymenobacteraceae(f)	1212	94	371	514		0.884626	0.138453	0.546142	0.64049
Proteobacteria	Gammaproteobacteria	Enterobacterales	Erwiniaceae	Pantoea	unkn. Pantoea(g)	1336	296	412	100		0.975133	0.43598	0.606498	0.124609
Proteobacteria	Betaproteobacteria	Burkholderiales	Comamonadaceae	Variovorax	unkn. Variovorax(g)	1360	20	589	610		0.99265	0.0294581	0.867056	0.760115
Firmicutes	Bacilli	Lactobacillales	Enterococcaceae	Enterococcus	unkn. Enterococcus(g)	1390	49	3	2		1.01455	0.0721724	0.00441625	0.00249218
Proteobacteria	Betaproteobacteria	Burkholderiales	Oxalobacteraceae	Massilia	unkn. Massilia(g)	1601	1266	256	271		1.16855	1.8647	0.376853	0.33769
Actinobacteria	Actinobacteria	Kineosporiales	Kineosporiaceae	Kineococcus	unkn. Kineococcus(g)	1738	45	1015	754		1.26855	0.0662808	1.49416	0.939552
Cyanobacteria	unkn. Cyanobacteria(p)	unkn. Cyanobacteria(p)	unkn. Cyanobacteria(p)	unkn. Cyanobacteria(p)	unkn. Cyanobacteria(p)	1851	656	1423	828		1.35103	0.966226	2.09477	1.03176
Proteobacteria	Gammaproteobacteria	Pseudomonadales	Pseudomonadaceae	Pseudomonas	unkn. Pseudomonas(g)	2890	3219	4114	6139		2.10938	4.74128	6.05615	7.64975
Proteobacteria	Betaproteobacteria	Burkholderiales	Oxalobacteraceae	Massilia	Massilia sp.	3283	1149	252	303		2.39623	1.69237	0.370965	0.377565
Bacteroidetes	Cytophagia	Cytophagales	Hymenobacteraceae	Hymenobacter	unkn. Hymenobacter(g)	3394	471	1951	3182		2.47725	0.693739	2.87203	3.96506
Proteobacteria	unkn. Proteobacteria(p)	unkn. Proteobacteria(p)	unkn. Proteobacteria(p)	unkn. Proteobacteria(p)	unkn. Proteobacteria(p)	3824	1646	1433	1482		2.7911	2.4244	2.10949	1.84671
Bacteroidetes	Cytophagia	Cytophagales	Hymenobacteraceae	Hymenobacter	Hymenobacter sp.	3971	681	2333	3293		2.89839	1.00305	3.43437	4.10338
Proteobacteria	Gammaproteobacteria	unkn. Gammaproteobacteria(c)	unkn. Gammaproteobacteria(c)	unkn. Gammaproteobacteria(c)	unkn. Gammaproteobacteria(c)	4505	380	3535	540		3.28815	0.559704	5.20381	0.672889
Proteobacteria	Alphaproteobacteria	Rhizobiales	Methylobacteriaceae	Methylobacterium	unkn. Methylobacterium(g)	4550	934	2576	2613		3.321	1.37569	3.79208	3.25603
Proteobacteria	Betaproteobacteria	Burkholderiales	Oxalobacteraceae	unkn. Oxalobacteraceae(f)	unkn. Oxalobacteraceae(f)	6797	4399	324	1148		4.96106	6.47931	0.476955	1.43051
Proteobacteria	Deltaproteobacteria	unkn. Deltaproteobacteria(c)	unkn. Deltaproteobacteria(c)	unkn. Deltaproteobacteria(c)	unkn. Deltaproteobacteria(c)	7114	999	1108	2688		5.19244	1.47143	1.63107	3.34949
Proteobacteria	Alphaproteobacteria	Sphingomonadales	Sphingomonadaceae	Sphingomonas	unkn. Sphingomonas(g)	7420	2184	2242	3812		5.41578	3.21683	3.30041	4.7501
unkn. Bacteria(d)	unkn. Bacteria(d)	unkn. Bacteria(d)	unkn. Bacteria(d)	unkn. Bacteria(d)	unkn. Bacteria(d)	43574	21893	19270	23457		31.8042	32.2463	28.367	29.2295
					Number of 16S reads	137007	67893	67931	80251		100	100	100	100

## Sheet: Table S4
Table S4 The abundance (operational taxonomic units, OTUs) and relative abundance (%) of fungi of dust collected from the leaf surface at different distances to the road (2, 10, 30, 50 m)
						Abundance, OTUs					Relative abundance, %
Phylum	Class	Order	Family	Genus	Species	2 m	10 m	30 m	50 m		2 m	10 m	30 m	50 m
Ascomycota	Dothideomycetes	Cladosporiales	Cladosporiaceae	Cladosporium	Cladosporium cladosporioides	0	7	0	26		0	0.016413	0	0.0784219
Ascomycota	Dothideomycetes	Cladosporiales	Cladosporiaceae	Cladosporium	Cladosporium perangustum	0	42	0	12		0	0.0984783	0	0.0361947
Ascomycota	Dothideomycetes	Cladosporiales	Cladosporiaceae	Cladosporium	Cladosporium sp.	0	0	193	39		0	0	0.417225	0.117633
Ascomycota	Dothideomycetes	Dothideales	Dothioraceae	Dothiora	Dothiora oleae	0	0	25	2		0	0	0.0540447	0.00603245
Ascomycota	Dothideomycetes	Dothideales	Dothioraceae	Dothiora	Dothiora prunorum	0	22	0	0		0	0.0515839	0	0
Ascomycota	Dothideomycetes	Dothideales	Dothioraceae	Hormonema	Hormonema carpetanum	0	1	18	0		0	0.00234472	0.0389122	0
Ascomycota	Dothideomycetes	Dothideales	Dothioraceae	unkn. Dothioraceae(f)	unkn. Dothioraceae(f)	0	2	8	35		0	0.00468944	0.0172943	0.105568
Ascomycota	Dothideomycetes	Dothideales	Saccotheciaceae	Saccothecium	Saccothecium rubi	0	251	18	0		0	0.588525	0.0389122	0
Ascomycota	Dothideomycetes	Mycosphaerellales	Mycosphaerellaceae	Geastrumia	unkn. Geastrumia(g)	0	0	0	303		0	0	0	0.913917
Ascomycota	Dothideomycetes	Mycosphaerellales	Mycosphaerellaceae	Mycosphaerella	Mycosphaerella sp. MU-2009-1	0	3	24	12		0	0.00703416	0.0518829	0.0361947
Ascomycota	Dothideomycetes	Mycosphaerellales	Teratosphaeriaceae	Capnobotryella	Capnobotryella sp. 130A	0	12	12	7		0	0.0281367	0.0259415	0.0211136
Ascomycota	Dothideomycetes	Mycosphaerellales	Teratosphaeriaceae	Penidiella	unkn. Penidiella(g)	0	0	21	3		0	0	0.0453976	0.00904868
Ascomycota	Dothideomycetes	Mycosphaerellales	Teratosphaeriaceae	unkn. Teratosphaeriaceae(f)	unkn. Teratosphaeriaceae(f)	0	3	30	8		0	0.00703416	0.0648536	0.0241298
Ascomycota	Dothideomycetes	Pleosporales	Cucurbitariaceae	unkn. Cucurbitariaceae(f)	unkn. Cucurbitariaceae(f)	0	6	15	1		0	0.0140683	0.0324268	0.00301623
Ascomycota	Dothideomycetes	Pleosporales	Leptosphaeriaceae	Ampelomyces	Ampelomyces quisqualis	0	3	4129	3		0	0.00703416	8.92602	0.00904868
Ascomycota	Dothideomycetes	Pleosporales	Leptosphaeriaceae	Ampelomyces	Ampelomyces sp. HMLAC212	0	0	12	10		0	0	0.0259415	0.0301623
Ascomycota	Dothideomycetes	Pleosporales	Leptosphaeriaceae	Ampelomyces	Ampelomyces sp. LK-2010	0	0	83	0		0	0	0.179428	0
Ascomycota	Dothideomycetes	Pleosporales	Leptosphaeriaceae	unkn. Leptosphaeriaceae(f)	unkn. Leptosphaeriaceae(f)	0	2	129	1		0	0.00468944	0.278871	0.00301623
Ascomycota	Dothideomycetes	Pleosporales	Massarinaceae	Massarina	Massarina sp. JP-2013	0	32	1	0		0	0.0750311	0.00216179	0
Ascomycota	Dothideomycetes	Pleosporales	Pleosporaceae	Alternaria	Alternaria tenuissima	0	4	2	22		0	0.00937888	0.00432358	0.066357
Ascomycota	Dothideomycetes	Pleosporales	unkn. Pleosporales(o)	Microsphaeropsis	Microsphaeropsis olivacea	0	10	11	0		0	0.0234472	0.0237797	0
Ascomycota	Dothideomycetes	Venturiales	unkn. Venturiales(o)	unkn. Venturiales(o)	unkn. Venturiales(o)	0	4	6	8		0	0.00937888	0.0129707	0.0241298
Ascomycota	Dothideomycetes	Venturiales	Venturiaceae	Venturia	Venturia inaequalis	0	1	32	96		0	0.00234472	0.0691772	0.289558
Ascomycota	Eurotiomycetes	Chaetothyriales	unkn. Chaetothyriales(o)	Sarcinomyces	unkn. Sarcinomyces(g)	0	5	46	5		0	0.0117236	0.0994423	0.0150811
Ascomycota	Eurotiomycetes	Chaetothyriales	unkn. Chaetothyriales(o)	unkn. Chaetothyriales(o)	Chaetothyriales sp. AR-2010	0	245	12	9		0	0.574457	0.0259415	0.027146
Ascomycota	Eurotiomycetes	Chaetothyriales	unkn. Chaetothyriales(o)	unkn. Chaetothyriales(o)	Chaetothyriales sp. F1	0	3	45	7		0	0.00703416	0.0972805	0.0211136
Ascomycota	Eurotiomycetes	Chaetothyriales	unkn. Chaetothyriales(o)	unkn. Chaetothyriales(o)	Chaetothyriales sp. G9.5E1d	0	0	20	12		0	0	0.0432358	0.0361947
Ascomycota	Eurotiomycetes	Phaeomoniellales	Phaeomoniellaceae	Phaeomoniella	unkn. Phaeomoniella(g)	0	2	16	1		0	0.00468944	0.0345886	0.00301623
Ascomycota	Eurotiomycetes	Phaeomoniellales	unkn. Phaeomoniellales(o)	unkn. Phaeomoniellales(o)	unkn. Phaeomoniellales(o)	0	0	39	4		0	0	0.0843097	0.0120649
Ascomycota	Leotiomycetes	Erysiphales	Erysiphaceae	Erysiphe	Erysiphe magnoliae	0	61	37	7		0	0.143028	0.0799862	0.0211136
Ascomycota	Leotiomycetes	Erysiphales	Erysiphaceae	Erysiphe	Erysiphe ornata	0	82	68	14		0	0.192267	0.147002	0.0422272
Ascomycota	Leotiomycetes	Erysiphales	Erysiphaceae	unkn. Erysiphaceae(f)	unkn. Erysiphaceae(f)	0	49	32	10		0	0.114891	0.0691772	0.0301623
Ascomycota	Leotiomycetes	Helotiales	Drepanopezizaceae	Godronia	Godronia cassandrae	0	62	2	4		0	0.145373	0.00432358	0.0120649
Ascomycota	Leotiomycetes	Helotiales	Lachnaceae	Lachnellula	Lachnellula fuscosanguinea	0	26	0	0		0	0.0609627	0	0
Ascomycota	Leotiomycetes	Rhytismatales	Rhytismataceae	Rhytisma	Rhytisma acerinum	0	26	0	0		0	0.0609627	0	0
Ascomycota	Orbiliomycetes	unkn. Orbiliomycetes(c)	unkn. Orbiliomycetes(c)	unkn. Orbiliomycetes(c)	unkn. Orbiliomycetes(c)	0	4	24	16		0	0.00937888	0.0518829	0.0482596
Ascomycota	Sordariomycetes	Hypocreales	unkn. Hypocreales(o)	unkn. Hypocreales(o)	unkn. Hypocreales(o)	0	2	6	31		0	0.00468944	0.0129707	0.093503
Basidiomycota	Exobasidiomycetes	Entylomatales	unkn. Entylomatales(o)	Tilletiopsis	Tilletiopsis sp. OVB10-015	0	1	2	31		0	0.00234472	0.00432358	0.093503
Basidiomycota	Exobasidiomycetes	Exobasidiales	Exobasidiaceae	Exobasidium	Exobasidium bisporum	0	15	259	276		0	0.0351708	0.559903	0.832479
Basidiomycota	Exobasidiomycetes	Exobasidiales	Exobasidiaceae	unkn. Exobasidiaceae(f)	unkn. Exobasidiaceae(f)	0	7	62	87		0	0.016413	0.134031	0.262412
Basidiomycota	Pucciniomycetes	Pucciniales	Pucciniastraceae	Melampsoridium	Melampsoridium betulinum	0	13	8	1		0	0.0304814	0.0172943	0.00301623
Basidiomycota	Tremellomycetes	Tremellales	Bulleraceae	Fonsecazyma	Fonsecazyma betulae	0	23	0	0		0	0.0539286	0	0
Mucoromycota	Mucoromycetes	Mucorales	Mucoraceae	Mucor	Mucor hiemalis	0	26	16	0		0	0.0609627	0.0345886	0
Ascomycota	Dothideomycetes	Dothideales	Dothideaceae	Coniozyma	unkn. Coniozyma(g)	1	3	10	15		0.00249333	0.00703416	0.0216179	0.0452434
Ascomycota	Dothideomycetes	Dothideales	Dothioraceae	Dothiora	Dothiora maculans	1	14	59	146		0.00249333	0.0328261	0.127546	0.440369
Ascomycota	Dothideomycetes	Mycosphaerellales	Mycosphaerellaceae	Ramularia	unkn. Ramularia(g)	1	0	17	40		0.00249333	0	0.0367504	0.120649
Ascomycota	Dothideomycetes	Mycosphaerellales	Teratosphaeriaceae	Devriesia	Devriesia pseudoamericana	1	12	2	6		0.00249333	0.0281367	0.00432358	0.0180974
Ascomycota	Dothideomycetes	Mycosphaerellales	unkn. Mycosphaerellales(o)	unkn. Mycosphaerellales(o)	unkn. Mycosphaerellales(o)	1	0	54	21		0.00249333	0	0.116737	0.0633408
Ascomycota	Dothideomycetes	Pleosporales	Leptosphaeriaceae	Ampelomyces	unkn. Ampelomyces(g)	1	18	1525	5		0.00249333	0.042205	3.29673	0.0150811
Ascomycota	Dothideomycetes	Pleosporales	Lophiostomataceae	Lophiostoma	Lophiostoma cynaroidis	1	38	0	0		0.00249333	0.0890994	0	0
Ascomycota	Dothideomycetes	Venturiales	Venturiaceae	unkn. Venturiaceae(f)	unkn. Venturiaceae(f)	1	5	6	11		0.00249333	0.0117236	0.0129707	0.0331785
Ascomycota	Dothideomycetes	Venturiales	Venturiaceae	Venturia	Venturia carpophila	1	1	2	11		0.00249333	0.00234472	0.00432358	0.0331785
Ascomycota	Eurotiomycetes	Chaetothyriales	Herpotrichiellaceae	Exophiala	unkn. Exophiala(g)	1	5	10	13		0.00249333	0.0117236	0.0216179	0.039211
Ascomycota	Eurotiomycetes	Chaetothyriales	Herpotrichiellaceae	unkn. Herpotrichiellaceae(f)	unkn. Herpotrichiellaceae(f)	1	12	23	29		0.00249333	0.0281367	0.0497211	0.0874706
Ascomycota	Eurotiomycetes	Chaetothyriales	Trichomeriaceae	Trichomerium	unkn. Trichomerium(g)	1	3	193	16		0.00249333	0.00703416	0.417225	0.0482596
Ascomycota	Lecanoromycetes	Teloschistales	Teloschistaceae	unkn. Teloschistaceae(f)	unkn. Teloschistaceae(f)	1	18	40	6		0.00249333	0.042205	0.0864715	0.0180974
Ascomycota	Lecanoromycetes	Teloschistales	unkn. Teloschistales(o)	unkn. Teloschistales(o)	unkn. Teloschistales(o)	1	18	22	4		0.00249333	0.042205	0.0475593	0.0120649
Ascomycota	Leotiomycetes	Erysiphales	Erysiphaceae	Erysiphe	Erysiphe deutziicola	1	30	15	2		0.00249333	0.0703416	0.0324268	0.00603245
Ascomycota	Leotiomycetes	Erysiphales	unkn. Erysiphales(o)	unkn. Erysiphales(o)	unkn. Erysiphales(o)	1	10	19	3		0.00249333	0.0234472	0.041074	0.00904868
Ascomycota	Leotiomycetes	Helotiales	Mollisiaceae	Phialocephala	Phialocephala sp. (in: Helotiales)	1	16	105	27		0.00249333	0.0375155	0.226988	0.0814381
Ascomycota	Sordariomycetes	Chaetosphaeriales	unkn. Chaetosphaeriales(o)	Dendrophoma	Dendrophoma pleurospora	1	23	8	4		0.00249333	0.0539286	0.0172943	0.0120649
Ascomycota	Sordariomycetes	Diaporthales	Diaporthaceae	Diaporthe	Diaporthe eres	1	10	11	1		0.00249333	0.0234472	0.0237797	0.00301623
Ascomycota	Taphrinomycetes	Taphrinales	Taphrinaceae	Taphrina	Taphrina carpini	1	13	7	7		0.00249333	0.0304814	0.0151325	0.0211136
Basidiomycota	Exobasidiomycetes	Exobasidiales	Exobasidiaceae	Exobasidium	Exobasidium japonicum	1	1	14	29		0.00249333	0.00234472	0.030265	0.0874706
Basidiomycota	Exobasidiomycetes	Exobasidiales	Exobasidiaceae	Exobasidium	Exobasidium miyabei	1	56	264	1208		0.00249333	0.131304	0.570712	3.6436
Basidiomycota	Exobasidiomycetes	Exobasidiales	unkn. Exobasidiales(o)	unkn. Exobasidiales(o)	unkn. Exobasidiales(o)	1	1	91	70		0.00249333	0.00234472	0.196723	0.211136
Basidiomycota	Tremellomycetes	Tremellales	Cryptococcaceae	Kwoniella	Kwoniella shivajii	1	21	2	0		0.00249333	0.0492391	0.00432358	0
unkn. Eukaryota(d)	unkn. Eukaryota(d)	unkn. Eukaryota(d)	unkn. Eukaryota(d)	unkn. Eukaryota(d)	fungal sp. TRN30	1	8	26	9		0.00249333	0.0187578	0.0562065	0.027146
Ascomycota	Dothideomycetes	Dothideales	Dothideaceae	Endoconidioma	Endoconidioma euphorbiae	2	1	6	15		0.00498666	0.00234472	0.0129707	0.0452434
Ascomycota	Dothideomycetes	Dothideales	Dothioraceae	Dothiora	unkn. Dothiora(g)	2	12	33	110		0.00498666	0.0281367	0.071339	0.331785
Ascomycota	Dothideomycetes	Mycosphaerellales	Mycosphaerellaceae	Ramularia	Ramularia phacae-frigidae	2	2	6	20		0.00498666	0.00468944	0.0129707	0.0603245
Ascomycota	Dothideomycetes	Pleosporales	Cucurbitariaceae	Neocucurbitaria	unkn. Neocucurbitaria(g)	2	17	15	7		0.00498666	0.0398603	0.0324268	0.0211136
Ascomycota	Dothideomycetes	Pleosporales	Didymosphaeriaceae	Paracamarosporium	Paracamarosporium fagi	2	138	122	17		0.00498666	0.323571	0.263738	0.0512759
Ascomycota	Eurotiomycetes	Eurotiales	unkn. Eurotiales(o)	unkn. Eurotiales(o)	unkn. Eurotiales(o)	2	7	6	10		0.00498666	0.016413	0.0129707	0.0301623
Ascomycota	Leotiomycetes	Erysiphales	Erysiphaceae	Erysiphe	unkn. Erysiphe(g)	2	1395	559	161		0.00498666	3.27089	1.20844	0.485613
Ascomycota	Leotiomycetes	Erysiphales	Erysiphaceae	Phyllactinia	Phyllactinia betulae	2	19	0	0		0.00498666	0.0445497	0	0
Ascomycota	Sordariomycetes	unkn. Sordariomycetes(c)	unkn. Sordariomycetes(c)	unkn. Sordariomycetes(c)	unkn. Sordariomycetes(c)	2	4	12	49		0.00498666	0.00937888	0.0259415	0.147795
Basidiomycota	Exobasidiomycetes	Exobasidiales	Exobasidiaceae	Exobasidium	unkn. Exobasidium(g)	2	36	725	878		0.00498666	0.08441	1.5673	2.64825
Basidiomycota	Tremellomycetes	Tremellales	Bulleraceae	Genolevuria	Genolevuria tibetensis	2	11	11	6		0.00498666	0.0257919	0.0237797	0.0180974
Ascomycota	Dothideomycetes	Pleosporales	Coniothyriaceae	Coniothyrium	unkn. Coniothyrium(g)	3	5	28	0		0.00747999	0.0117236	0.0605301	0
Ascomycota	Dothideomycetes	Pleosporales	Didymellaceae	Epicoccum	unkn. Epicoccum(g)	3	2	63	4		0.00747999	0.00468944	0.136193	0.0120649
Ascomycota	Dothideomycetes	Pleosporales	Melanommataceae	Pseudotrichia	Pseudotrichia sp. (in: Fungi)	3	11	4	0		0.00747999	0.0257919	0.00864715	0
Ascomycota	Dothideomycetes	Pleosporales	Phaeosphaeriaceae	Muriphaeosphaeria	Muriphaeosphaeria viburni	3	5	23	6		0.00747999	0.0117236	0.0497211	0.0180974
Ascomycota	Dothideomycetes	Pleosporales	Pleosporaceae	Alternaria	Alternaria infectoria	3	2	22	0		0.00747999	0.00468944	0.0475593	0
Ascomycota	Eurotiomycetes	Eurotiales	Aspergillaceae	Aspergillus	unkn. Aspergillus(g)	3	22	14	9		0.00747999	0.0515839	0.030265	0.027146
Ascomycota	Eurotiomycetes	Eurotiales	Aspergillaceae	unkn. Aspergillaceae(f)	unkn. Aspergillaceae(f)	3	4	7	6		0.00747999	0.00937888	0.0151325	0.0180974
Ascomycota	Sordariomycetes	Diaporthales	Schizoparmaceae	Coniella	Coniella diplodiella	3	8	19	0		0.00747999	0.0187578	0.041074	0
Ascomycota	Sordariomycetes	Hypocreales	unkn. Hypocreales(o)	Cephalosporium	unkn. Cephalosporium(g)	3	0	7	54		0.00747999	0	0.0151325	0.162876
Basidiomycota	Agaricomycetes	Polyporales	Polyporaceae	unkn. Polyporaceae(f)	unkn. Polyporaceae(f)	3	11	5	2		0.00747999	0.0257919	0.0108089	0.00603245
Basidiomycota	Cystobasidiomycetes	Cystobasidiales	Cystobasidiaceae	unkn. Cystobasidiaceae(f)	unkn. Cystobasidiaceae(f)	3	5	8	4		0.00747999	0.0117236	0.0172943	0.0120649
unkn. Eukaryota(d)	unkn. Eukaryota(d)	unkn. Eukaryota(d)	unkn. Eukaryota(d)	unkn. Eukaryota(d)	fungal sp. 19.19	3	22	281	192		0.00747999	0.0515839	0.607462	0.579116
Ascomycota	Dothideomycetes	Dothideales	Saccotheciaceae	Aureobasidium	Aureobasidium melanogenum	4	0	16	5		0.00997332	0	0.0345886	0.0150811
Ascomycota	Dothideomycetes	Mycosphaerellales	Mycosphaerellaceae	Ramularia	Ramularia vizellae	4	2	26	17		0.00997332	0.00468944	0.0562065	0.0512759
Ascomycota	Dothideomycetes	Mycosphaerellales	Mycosphaerellaceae	unkn. Mycosphaerellaceae(f)	unkn. Mycosphaerellaceae(f)	4	7	74	97		0.00997332	0.016413	0.159972	0.292574
Ascomycota	Eurotiomycetes	Chaetothyriales	unkn. Chaetothyriales(o)	Hyalocladosporiella	unkn. Hyalocladosporiella(g)	4	10	9	3		0.00997332	0.0234472	0.0194561	0.00904868
Ascomycota	Lecanoromycetes	Teloschistales	Teloschistaceae	Xanthoria	unkn. Xanthoria(g)	4	32	49	13		0.00997332	0.0750311	0.105928	0.039211
Ascomycota	Leotiomycetes	Helotiales	unkn. Helotiales(o)	unkn. Helotiales(o)	Helotiales sp. MUT 5177	4	17	17	21		0.00997332	0.0398603	0.0367504	0.0633408
Basidiomycota	Pucciniomycetes	Pucciniales	Melampsoraceae	Melampsora	unkn. Melampsora(g)	4	21	31	6		0.00997332	0.0492391	0.0670154	0.0180974
unkn. Eukaryota(d)	unkn. Eukaryota(d)	unkn. Eukaryota(d)	unkn. Eukaryota(d)	unkn. Eukaryota(d)	fungal sp. MUT 5270	4	53	0	2		0.00997332	0.12427	0	0.00603245
Ascomycota	Dothideomycetes	Dothideales	Dothioraceae	unkn. Dothioraceae(f)	Dothioraceae sp.	5	26	17	31		0.0124667	0.0609627	0.0367504	0.093503
Ascomycota	Dothideomycetes	Dothideales	Saccotheciaceae	unkn. Saccotheciaceae(f)	unkn. Saccotheciaceae(f)	5	18	43	8		0.0124667	0.042205	0.0929569	0.0241298
Ascomycota	Dothideomycetes	Pleosporales	Didymellaceae	Boeremia	Boeremia sp.	5	3	2	6		0.0124667	0.00703416	0.00432358	0.0180974
Ascomycota	Dothideomycetes	Pleosporales	unkn. Pleosporales(o)	unkn. Pleosporales(o)	Pleosporales sp.	5	18	17	2		0.0124667	0.042205	0.0367504	0.00603245
Ascomycota	Dothideomycetes	Pleosporales	unkn. Pleosporales(o)	unkn. Pleosporales(o)	Pleosporales sp. 19 KB-2015	5	57	8	6		0.0124667	0.133649	0.0172943	0.0180974
Ascomycota	Eurotiomycetes	Chaetothyriales	unkn. Chaetothyriales(o)	Sarcinomyces	Sarcinomyces sp. 1313A	5	86	348	87		0.0124667	0.201646	0.752302	0.262412
Basidiomycota	Agaricomycetes	Agaricales	Psathyrellaceae	Coprinellus	Coprinellus disseminatus	5	7	5	2		0.0124667	0.016413	0.0108089	0.00603245
Basidiomycota	Agaricomycetes	Agaricales	Psathyrellaceae	Coprinellus	Coprinellus micaceus	5	6	21	5		0.0124667	0.0140683	0.0453976	0.0150811
Basidiomycota	Cystobasidiomycetes	unkn. Cystobasidiomycetes(c)	unkn. Cystobasidiomycetes(c)	Buckleyzyma	unkn. Buckleyzyma(g)	5	1	9	7		0.0124667	0.00234472	0.0194561	0.0211136
Basidiomycota	Exobasidiomycetes	Entylomatales	unkn. Entylomatales(o)	Tilletiopsis	Tilletiopsis sp. OVB10-013	5	0	11	62		0.0124667	0	0.0237797	0.187006
unkn. Eukaryota(d)	unkn. Eukaryota(d)	unkn. Eukaryota(d)	unkn. Eukaryota(d)	unkn. Eukaryota(d)	fungal endophyte	5	5	19	11		0.0124667	0.0117236	0.041074	0.0331785
Ascomycota	Dothideomycetes	Dothideales	Dothideaceae	Coniozyma	Coniozyma sp. Rr102	6	44	46	29		0.01496	0.103168	0.0994423	0.0874706
Ascomycota	Dothideomycetes	Pleosporales	Didymellaceae	Phoma	Phoma herbarum	6	3	17	10		0.01496	0.00703416	0.0367504	0.0301623
Ascomycota	Dothideomycetes	Pleosporales	Melanommataceae	Alpinaria	unkn. Alpinaria(g)	6	5	32	28		0.01496	0.0117236	0.0691772	0.0844544
Ascomycota	Lecanoromycetes	unkn. Lecanoromycetes(c)	unkn. Lecanoromycetes(c)	unkn. Lecanoromycetes(c)	unkn. Lecanoromycetes(c)	6	23	34	7		0.01496	0.0539286	0.0735008	0.0211136
Ascomycota	Sordariomycetes	Xylariales	Microdochiaceae	unkn. Microdochiaceae(f)	unkn. Microdochiaceae(f)	6	15	1	0		0.01496	0.0351708	0.00216179	0
Ascomycota	unkn. Ascomycota(p)	unkn. Ascomycota(p)	unkn. Ascomycota(p)	unkn. Ascomycota(p)	Ascomycota sp.	6	6	6	7		0.01496	0.0140683	0.0129707	0.0211136
Basidiomycota	Exobasidiomycetes	Microstromatales	Quambalariaceae	Quambalaria	Quambalaria cyanescens	6	4	70	10		0.01496	0.00937888	0.151325	0.0301623
Basidiomycota	Pucciniomycetes	Pucciniales	Melampsoraceae	Melampsora	Melampsora caprearum	6	8	11	2		0.01496	0.0187578	0.0237797	0.00603245
Basidiomycota	Tremellomycetes	Tremellales	Bulleribasidiaceae	Vishniacozyma	Vishniacozyma globispora	6	7	5	5		0.01496	0.016413	0.0108089	0.0150811
Basidiomycota	Tremellomycetes	Tremellales	Cryptococcaceae	Cryptococcus	unkn. Cryptococcus(g)	6	17	16	19		0.01496	0.0398603	0.0345886	0.0573083
Basidiomycota	Tremellomycetes	unkn. Tremellomycetes(c)	unkn. Tremellomycetes(c)	unkn. Tremellomycetes(c)	unkn. Tremellomycetes(c)	6	6	97	13		0.01496	0.0140683	0.209693	0.039211
Ascomycota	Dothideomycetes	Pleosporales	Astrosphaeriellaceae	Pithomyces	Pithomyces chartarum	7	14	12	2		0.0174533	0.0328261	0.0259415	0.00603245
Ascomycota	Dothideomycetes	Pleosporales	Didymellaceae	Didymella	unkn. Didymella(g)	7	20	33	3		0.0174533	0.0468944	0.071339	0.00904868
Ascomycota	Leotiomycetes	unkn. Leotiomycetes(c)	unkn. Leotiomycetes(c)	unkn. Leotiomycetes(c)	unkn. Leotiomycetes(c)	7	73	80	113		0.0174533	0.171165	0.172943	0.340834
Ascomycota	Taphrinomycetes	Taphrinales	unkn. Taphrinales(o)	unkn. Taphrinales(o)	unkn. Taphrinales(o)	7	7	13	25		0.0174533	0.016413	0.0281032	0.0754057
Basidiomycota	Agaricomycetes	Russulales	Peniophoraceae	Peniophora	Peniophora quercina	7	12	11	5		0.0174533	0.0281367	0.0237797	0.0150811
Basidiomycota	Microbotryomycetes	unkn. Microbotryomycetes(c)	unkn. Microbotryomycetes(c)	unkn. Microbotryomycetes(c)	unkn. Microbotryomycetes(c)	7	0	5	6		0.0174533	0	0.0108089	0.0180974
Basidiomycota	unkn. Basidiomycota(p)	unkn. Basidiomycota(p)	unkn. Basidiomycota(p)	unkn. Basidiomycota(p)	basidiomycete from Chimonobambusa marmorea	7	4	5	4		0.0174533	0.00937888	0.0108089	0.0120649
Ascomycota	Dothideomycetes	Mycosphaerellales	Teratosphaeriaceae	Neocatenulostroma	Neocatenulostroma germanicum	8	12	0	0		0.0199466	0.0281367	0	0
Ascomycota	Dothideomycetes	Pleosporales	Pleosporaceae	Alternaria	unkn. Alternaria(g)	8	73	47	4		0.0199466	0.171165	0.101604	0.0120649
Ascomycota	Eurotiomycetes	Chaetothyriales	Trichomeriaceae	unkn. Trichomeriaceae(f)	unkn. Trichomeriaceae(f)	8	28	380	74		0.0199466	0.0656522	0.82148	0.223201
Ascomycota	Taphrinomycetes	Taphrinales	Taphrinaceae	Taphrina	Taphrina wiesneri	8	3	4	2		0.0199466	0.00703416	0.00864715	0.00603245
Basidiomycota	unkn. Basidiomycota(p)	unkn. Basidiomycota(p)	unkn. Basidiomycota(p)	unkn. Basidiomycota(p)	Basidiomycota sp. D5	8	4	12	2		0.0199466	0.00937888	0.0259415	0.00603245
unkn. Eukaryota(d)	unkn. Eukaryota(d)	unkn. Eukaryota(d)	unkn. Eukaryota(d)	unkn. Eukaryota(d)	fungal sp. NLR-2013	8	5	16	33		0.0199466	0.0117236	0.0345886	0.0995355
Ascomycota	Dothideomycetes	Venturiales	Venturiaceae	Venturia	Venturia helvetica	9	0	28	0		0.02244	0	0.0605301	0
Basidiomycota	Cystobasidiomycetes	Cystobasidiales	Cystobasidiaceae	Cystobasidium	Cystobasidium sp.	9	5	15	0		0.02244	0.0117236	0.0324268	0
Ascomycota	Dothideomycetes	Pleosporales	Coniothyriaceae	Coniothyrium	Coniothyrium sp.	10	9	17	7		0.0249333	0.0211025	0.0367504	0.0211136
Ascomycota	Leotiomycetes	Helotiales	Mollisiaceae	unkn. Mollisiaceae(f)	unkn. Mollisiaceae(f)	10	38	27	11		0.0249333	0.0890994	0.0583683	0.0331785
Basidiomycota	Exobasidiomycetes	Microstromatales	Microstromataceae	unkn. Microstromataceae(f)	unkn. Microstromataceae(f)	10	12	8	9		0.0249333	0.0281367	0.0172943	0.027146
unkn. Eukaryota(d)	unkn. Eukaryota(d)	unkn. Eukaryota(d)	unkn. Eukaryota(d)	unkn. Eukaryota(d)	fungal sp. NLEndoHerit_014_2008N5-26-2N	10	8	0	1		0.0249333	0.0187578	0	0.00301623
Ascomycota	Taphrinomycetes	Taphrinales	Taphrinaceae	unkn. Taphrinaceae(f)	unkn. Taphrinaceae(f)	11	19	9	24		0.0274266	0.0445497	0.0194561	0.0723895
Basidiomycota	Tremellomycetes	Tremellales	Bulleribasidiaceae	Vishniacozyma	Vishniacozyma victoriae	11	4	0	3		0.0274266	0.00937888	0	0.00904868
Ascomycota	Dothideomycetes	Cladosporiales	Cladosporiaceae	unkn. Cladosporiaceae(f)	unkn. Cladosporiaceae(f)	12	1	4	7		0.02992	0.00234472	0.00864715	0.0211136
Ascomycota	Dothideomycetes	Dothideales	Dothioraceae	Dothiora	Dothiora sorbi	12	123	306	544		0.02992	0.288401	0.661507	1.64083
Ascomycota	Dothideomycetes	Pleosporales	Didymellaceae	Phoma	unkn. Phoma(g)	12	8	15	18		0.02992	0.0187578	0.0324268	0.0542921
Ascomycota	Dothideomycetes	Pleosporales	Didymosphaeriaceae	Paraphaeosphaeria	Paraphaeosphaeria sp. TMS-2011	12	8	6	3		0.02992	0.0187578	0.0129707	0.00904868
Ascomycota	Dothideomycetes	Pleosporales	Nigrogranaceae	Nigrograna	Nigrograna obliqua	12	114	1	0		0.02992	0.267298	0.00216179	0
Ascomycota	Dothideomycetes	unkn. Dothideomycetes(c)	unkn. Dothideomycetes(c)	unkn. Dothideomycetes(c)	Dothideomycetes sp.	12	54	54	83		0.02992	0.126615	0.116737	0.250347
Ascomycota	Lecanoromycetes	Teloschistales	Teloschistaceae	Xanthoria	Xanthoria parietina	12	32	110	22		0.02992	0.0750311	0.237797	0.066357
Ascomycota	Leotiomycetes	Helotiales	Discinellaceae	Lemonniera	Lemonniera sp. MUT 5444	12	12	7	7		0.02992	0.0281367	0.0151325	0.0211136
Ascomycota	Taphrinomycetes	Taphrinales	Taphrinaceae	Taphrina	Taphrina sacchari	12	46	4	1		0.02992	0.107857	0.00864715	0.00301623
Basidiomycota	Agaricomycetes	Polyporales	Polyporaceae	Ganoderma	unkn. Ganoderma(g)	12	32	26	10		0.02992	0.0750311	0.0562065	0.0301623
Basidiomycota	Agaricostilbomycetes	Agaricostilbales	Kondoaceae	Bensingtonia	unkn. Bensingtonia(g)	12	3	6	10		0.02992	0.00703416	0.0129707	0.0301623
Basidiomycota	Tremellomycetes	Cystofilobasidiales	Mrakiaceae	Itersonilia	Itersonilia perplexans	12	5	1	1		0.02992	0.0117236	0.00216179	0.00301623
Ascomycota	Dothideomycetes	Pleosporales	Melanommataceae	Alpinaria	Alpinaria sp.	14	8	13	22		0.0349066	0.0187578	0.0281032	0.066357
Ascomycota	Leotiomycetes	Erysiphales	Erysiphaceae	Phyllactinia	unkn. Phyllactinia(g)	14	23	1	2		0.0349066	0.0539286	0.00216179	0.00603245
Ascomycota	Leotiomycetes	Helotiales	unkn. Helotiales(o)	unkn. Helotiales(o)	Helotiales sp.	14	66	35	10		0.0349066	0.154752	0.0756626	0.0301623
Ascomycota	Taphrinomycetes	Taphrinales	Taphrinaceae	Taphrina	Taphrina sp.	14	26	10	6		0.0349066	0.0609627	0.0216179	0.0180974
Ascomycota	Taphrinomycetes	unkn. Taphrinomycetes(c)	unkn. Taphrinomycetes(c)	unkn. Taphrinomycetes(c)	unkn. Taphrinomycetes(c)	14	7	21	63		0.0349066	0.016413	0.0453976	0.190022
Basidiomycota	Cystobasidiomycetes	Cystobasidiales	Cystobasidiaceae	Cystobasidium	Cystobasidium laryngis	14	3	2	2		0.0349066	0.00703416	0.00432358	0.00603245
Basidiomycota	Atractiellomycetes	unkn. Atractiellomycetes(c)	unkn. Atractiellomycetes(c)	unkn. Atractiellomycetes(c)	unkn. Atractiellomycetes(c)	15	0	1	1		0.0374	0	0.00216179	0.00301623
Ascomycota	Dothideomycetes	Pleosporales	Phaeosphaeriaceae	Neosetophoma	Neosetophoma italica	16	0	1	0		0.0398933	0	0.00216179	0
Basidiomycota	Cystobasidiomycetes	unkn. Cystobasidiomycetes(c)	Symmetrosporaceae	Symmetrospora	Symmetrospora gracilis	16	21	45	15		0.0398933	0.0492391	0.0972805	0.0452434
Ascomycota	Dothideomycetes	Pleosporales	Didymellaceae	Didymella	Didymella glomerata	17	48	64	10		0.0423866	0.112547	0.138354	0.0301623
Ascomycota	Dothideomycetes	Pleosporales	Didymellaceae	Leptosphaerulina	Leptosphaerulina australis	17	25	3	2		0.0423866	0.058618	0.00648536	0.00603245
Ascomycota	Dothideomycetes	Pleosporales	Didymellaceae	Neoascochyta	Neoascochyta exitialis	17	7	4	0		0.0423866	0.016413	0.00864715	0
Ascomycota	Dothideomycetes	Pleosporales	Parapyrenochaetaceae	Parapyrenochaeta	Parapyrenochaeta sp.	17	9	29	12		0.0423866	0.0211025	0.0626919	0.0361947
Ascomycota	Leotiomycetes	Helotiales	Sclerotiniaceae	Septotinia	Septotinia podophyllina	17	12	0	0		0.0423866	0.0281367	0	0
Basidiomycota	Pucciniomycetes	Pucciniales	Melampsoraceae	Melampsora	Melampsora laricis	17	0	0	0		0.0423866	0	0	0
Basidiomycota	unkn. Basidiomycota(p)	unkn. Basidiomycota(p)	unkn. Basidiomycota(p)	unkn. Basidiomycota(p)	Basidiomycota sp. D3	17	20	24	10		0.0423866	0.0468944	0.0518829	0.0301623
Ascomycota	Leotiomycetes	Helotiales	unkn. Helotiales(o)	unkn. Helotiales(o)	unkn. Helotiales(o)	18	54	76	19		0.0448799	0.126615	0.164296	0.0573083
Ascomycota	Dothideomycetes	Pleosporales	Leptosphaeriaceae	Leptosphaeria	Leptosphaeria sp. E-000535665	19	2	0	0		0.0473733	0.00468944	0	0
Basidiomycota	Tremellomycetes	Tremellales	Bulleribasidiaceae	Vishniacozyma	Vishniacozyma tephrensis	19	7	3	2		0.0473733	0.016413	0.00648536	0.00603245
Ascomycota	Dothideomycetes	Dothideales	Dothideaceae	Endoconidioma	Endoconidioma populi	20	74	55	109		0.0498666	0.173509	0.118898	0.328769
Ascomycota	Dothideomycetes	Pleosporales	Didymellaceae	Phoma	Phoma sp. NF-H	20	10	22	14		0.0498666	0.0234472	0.0475593	0.0422272
Ascomycota	Leotiomycetes	Helotiales	Sclerotiniaceae	Botrytis	Botrytis cinerea	20	11	0	0		0.0498666	0.0257919	0	0
Basidiomycota	Agaricomycetes	unkn. Agaricomycetes(c)	unkn. Agaricomycetes(c)	unkn. Agaricomycetes(c)	unkn. Agaricomycetes(c)	20	12	18	16		0.0498666	0.0281367	0.0389122	0.0482596
Ascomycota	Leotiomycetes	Helotiales	Mollisiaceae	Phialocephala	unkn. Phialocephala(g)	21	63	90	32		0.0523599	0.147717	0.194561	0.0965193
Basidiomycota	Agaricomycetes	Polyporales	Polyporaceae	Ganoderma	Ganoderma applanatum	22	0	0	0		0.0548533	0	0	0
Ascomycota	Dothideomycetes	Venturiales	Venturiaceae	Venturia	Venturia ditricha	23	442	130	66		0.0573466	1.03637	0.281032	0.199071
Ascomycota	Leotiomycetes	Helotiales	Sclerotiniaceae	Septotinia	unkn. Septotinia(g)	23	114	2	0		0.0573466	0.267298	0.00432358	0
Ascomycota	Eurotiomycetes	unkn. Eurotiomycetes(c)	unkn. Eurotiomycetes(c)	unkn. Eurotiomycetes(c)	unkn. Eurotiomycetes(c)	24	108	1922	985		0.0598399	0.25323	4.15496	2.97098
Basidiomycota	Exobasidiomycetes	Entylomatales	unkn. Entylomatales(o)	Tilletiopsis	Tilletiopsis washingtonensis	25	2	9	11		0.0623333	0.00468944	0.0194561	0.0331785
Ascomycota	Dothideomycetes	Pleosporales	Didymellaceae	Epicoccum	Epicoccum nigrum	26	36	48	31		0.0648266	0.08441	0.103766	0.093503
Basidiomycota	Exobasidiomycetes	unkn. Exobasidiomycetes(c)	unkn. Exobasidiomycetes(c)	unkn. Exobasidiomycetes(c)	unkn. Exobasidiomycetes(c)	26	51	228	498		0.0648266	0.119581	0.492888	1.50208
Basidiomycota	Tremellomycetes	Tremellales	Tremellaceae	Tremella	Tremella griseola	26	21	11	7		0.0648266	0.0492391	0.0237797	0.0211136
Basidiomycota	Tremellomycetes	Tremellales	unkn. Tremellales(o)	unkn. Tremellales(o)	unkn. Tremellales(o)	26	12	15	8		0.0648266	0.0281367	0.0324268	0.0241298
Ascomycota	Dothideomycetes	Pleosporales	Didymellaceae	Phoma	Phoma sp.	27	36	40	12		0.0673199	0.08441	0.0864715	0.0361947
Basidiomycota	Tremellomycetes	Tremellales	Bulleraceae	Genolevuria	unkn. Genolevuria(g)	27	87	34	17		0.0673199	0.203991	0.0735008	0.0512759
Ascomycota	Dothideomycetes	Pleosporales	Pleosporaceae	Alternaria	Alternaria sp.	29	9	166	0		0.0723066	0.0211025	0.358857	0
Basidiomycota	Tremellomycetes	Filobasidiales	Filobasidiaceae	Filobasidium	Filobasidium wieringae	29	42	20	8		0.0723066	0.0984783	0.0432358	0.0241298
unkn. Eukaryota(d)	unkn. Eukaryota(d)	unkn. Eukaryota(d)	unkn. Eukaryota(d)	unkn. Eukaryota(d)	fungal sp.	29	22	20	6		0.0723066	0.0515839	0.0432358	0.0180974
Basidiomycota	Exobasidiomycetes	Microstromatales	unkn. Microstromatales(o)	Jaminaea	unkn. Jaminaea(g)	30	9	3	10		0.0747999	0.0211025	0.00648536	0.0301623
Ascomycota	Dothideomycetes	Venturiales	Venturiaceae	Venturia	unkn. Venturia(g)	32	88	183	496		0.0797866	0.206335	0.395607	1.49605
Ascomycota	Sordariomycetes	Xylariales	Microdochiaceae	Microdochium	unkn. Microdochium(g)	32	29	6	2		0.0797866	0.0679969	0.0129707	0.00603245
Ascomycota	Eurotiomycetes	Chaetothyriales	unkn. Chaetothyriales(o)	unkn. Chaetothyriales(o)	unkn. Chaetothyriales(o)	33	112	959	287		0.0822799	0.262609	2.07315	0.865657
Basidiomycota	Agaricostilbomycetes	Agaricostilbales	Kondoaceae	Bensingtonia	Bensingtonia sp. PYCC 5551	36	20	93	113		0.0897599	0.0468944	0.201046	0.340834
Ascomycota	Dothideomycetes	Dothideales	unkn. Dothideales(o)	unkn. Dothideales(o)	unkn. Dothideales(o)	37	184	213	370		0.0922532	0.431429	0.460461	1.116
Basidiomycota	Microbotryomycetes	Sporidiobolales	Sporidiobolaceae	Sporobolomyces	Sporobolomyces roseus	37	4	0	2		0.0922532	0.00937888	0	0.00603245
Ascomycota	Dothideomycetes	Pleosporales	Amorosiaceae	Angustimassarina	Angustimassarina italica	38	380	417	121		0.0947466	0.890994	0.901466	0.364964
Ascomycota	Dothideomycetes	Venturiales	Venturiaceae	Venturia	Venturia fuliginosa	39	89	0	0		0.0972399	0.20868	0	0
Basidiomycota	Agaricostilbomycetes	Agaricostilbales	unkn. Agaricostilbales(o)	unkn. Agaricostilbales(o)	unkn. Agaricostilbales(o)	40	6	3	1		0.0997332	0.0140683	0.00648536	0.00301623
Ascomycota	Eurotiomycetes	Chaetothyriales	Trichomeriaceae	Knufia	unkn. Knufia(g)	41	123	109	20		0.102227	0.288401	0.235635	0.0603245
Basidiomycota	Cystobasidiomycetes	unkn. Cystobasidiomycetes(c)	unkn. Cystobasidiomycetes(c)	unkn. Cystobasidiomycetes(c)	unkn. Cystobasidiomycetes(c)	44	24	112	74		0.109707	0.0562733	0.24212	0.223201
Ascomycota	Sordariomycetes	Hypocreales	unkn. Hypocreales(o)	Cephalosporium	Cephalosporium gramineum	46	33	81	1306		0.114693	0.0773758	0.175105	3.93919
Ascomycota	Dothideomycetes	Pleosporales	Didymellaceae	Didymella	Didymella macrostoma	52	20	0	0		0.129653	0.0468944	0	0
Ascomycota	Dothideomycetes	Pleosporales	Lentitheciaceae	Pleurophoma	Pleurophoma sp.	52	28	23	0		0.129653	0.0656522	0.0497211	0
Ascomycota	Taphrinomycetes	Taphrinales	Taphrinaceae	Taphrina	Taphrina deformans	56	19	15	15		0.139626	0.0445497	0.0324268	0.0452434
unkn. Eukaryota(d)	unkn. Eukaryota(d)	unkn. Eukaryota(d)	unkn. Eukaryota(d)	unkn. Eukaryota(d)	fungal sp. APA-2013	63	3	10	7		0.15708	0.00703416	0.0216179	0.0211136
Ascomycota	Dothideomycetes	Pleosporales	unkn. Pleosporales(o)	unkn. Pleosporales(o)	unkn. Pleosporales(o)	68	161	755	483		0.169546	0.3775	1.63215	1.45684
Basidiomycota	Agaricostilbomycetes	Agaricostilbales	Kondoaceae	unkn. Kondoaceae(f)	unkn. Kondoaceae(f)	72	9	13	1		0.17952	0.0211025	0.0281032	0.00301623
Basidiomycota	Cystobasidiomycetes	Cystobasidiales	Cystobasidiaceae	Cystobasidium	unkn. Cystobasidium(g)	72	34	47	16		0.17952	0.0797205	0.101604	0.0482596
Ascomycota	Leotiomycetes	Helotiales	Sclerotiniaceae	Septotinia	Septotinia populiperda	73	33	0	0		0.182013	0.0773758	0	0
Ascomycota	Dothideomycetes	Cladosporiales	Cladosporiaceae	Cladosporium	unkn. Cladosporium(g)	76	36	66	242		0.189493	0.08441	0.142678	0.729927
Ascomycota	Taphrinomycetes	Taphrinales	Taphrinaceae	Taphrina	Taphrina betulina	90	95	46	64		0.2244	0.222748	0.0994423	0.193039
Basidiomycota	Agaricostilbomycetes	Agaricostilbales	Kondoaceae	Kondoa	Kondoa aeria	94	10	1	0		0.234373	0.0234472	0.00216179	0
Basidiomycota	Cystobasidiomycetes	unkn. Cystobasidiomycetes(c)	unkn. Cystobasidiomycetes(c)	Buckleyzyma	Buckleyzyma aurantiaca	109	80	78	14		0.271773	0.187578	0.168619	0.0422272
Ascomycota	Taphrinomycetes	Taphrinales	Taphrinaceae	Taphrina	unkn. Taphrina(g)	110	117	54	85		0.274266	0.274332	0.116737	0.256379
Ascomycota	Dothideomycetes	unkn. Dothideomycetes(c)	unkn. Dothideomycetes(c)	unkn. Dothideomycetes(c)	unkn. Dothideomycetes(c)	120	468	1682	1069		0.2992	1.09733	3.63613	3.22435
Basidiomycota	Cystobasidiomycetes	Cystobasidiales	Cystobasidiaceae	Cystobasidium	Cystobasidium minutum	122	0	0	0		0.304186	0	0	0
Ascomycota	Dothideomycetes	Dothideales	Saccotheciaceae	Aureobasidium	unkn. Aureobasidium(g)	128	79	270	80		0.319146	0.185233	0.583683	0.241298
Basidiomycota	Agaricostilbomycetes	Agaricostilbales	Kondoaceae	Kondoa	unkn. Kondoa(g)	128	72	24	3		0.319146	0.16882	0.0518829	0.00904868
Ascomycota	Dothideomycetes	Venturiales	Venturiaceae	Venturia	Venturia tremulae	133	339	145	160		0.331613	0.79486	0.313459	0.482596
Ascomycota	Dothideomycetes	Mycosphaerellales	Mycosphaerellaceae	Mycosphaerella	Mycosphaerella sp.	152	11	11	7		0.378986	0.0257919	0.0237797	0.0211136
Basidiomycota	Cystobasidiomycetes	Cystobasidiales	Cystobasidiaceae	Cystobasidium	Cystobasidium sp. NRRL Y-17502	153	60	308	102		0.38148	0.140683	0.665831	0.307655
Basidiomycota	Exobasidiomycetes	Microstromatales	Microstromataceae	Microstroma	unkn. Microstroma(g)	167	84	42	40		0.416386	0.196957	0.0907951	0.120649
Basidiomycota	Exobasidiomycetes	Microstromatales	unkn. Microstromatales(o)	Pseudomicrostroma	Pseudomicrostroma juglandis	182	2	0	0		0.453786	0.00468944	0	0
Basidiomycota	Exobasidiomycetes	Microstromatales	unkn. Microstromatales(o)	Pseudomicrostroma	unkn. Pseudomicrostroma(g)	255	378	144	346		0.635799	0.886304	0.311298	1.04361
Ascomycota	Eurotiomycetes	Chaetothyriales	Trichomeriaceae	Knufia	Knufia cryptophialidica	281	730	373	24		0.700626	1.71165	0.806347	0.0723895
Ascomycota	Dothideomycetes	Botryosphaeriales	Botryosphaeriaceae	Microdiplodia	Microdiplodia sp. NEFU17	302	292	14	1		0.752986	0.684658	0.030265	0.00301623
Ascomycota	Dothideomycetes	Pleosporales	Cucurbitariaceae	Neocucurbitaria	Neocucurbitaria cava	315	575	270	264		0.785399	1.34821	0.583683	0.796284
Ascomycota	Eurotiomycetes	Chaetothyriales	Trichomeriaceae	Knufia	Knufia perfecta	328	810	306	85		0.817812	1.89922	0.661507	0.256379
Basidiomycota	Cystobasidiomycetes	Cystobasidiales	Cystobasidiaceae	Cystobasidium	Cystobasidium sp. CBS 8923	336	288	225	34		0.837759	0.67528	0.486402	0.102552
Basidiomycota	Agaricostilbomycetes	unkn. Agaricostilbomycetes(c)	unkn. Agaricostilbomycetes(c)	unkn. Agaricostilbomycetes(c)	unkn. Agaricostilbomycetes(c)	349	43	27	9		0.870172	0.100823	0.0583683	0.027146
Basidiomycota	Cystobasidiomycetes	Erythrobasidiales	Erythrobasidiaceae	Erythrobasidium	Erythrobasidium hasegawianum	468	140	28	0		1.16688	0.328261	0.0605301	0
Ascomycota	Dothideomycetes	Pleosporales	Didymellaceae	unkn. Didymellaceae(f)	unkn. Didymellaceae(f)	867	381	297	193		2.16172	0.893339	0.642051	0.582132
Basidiomycota	unkn. Basidiomycota(p)	unkn. Basidiomycota(p)	unkn. Basidiomycota(p)	unkn. Basidiomycota(p)	unkn. Basidiomycota(p)	1439	603	810	1027		3.5879	1.41387	1.75105	3.09767
Basidiomycota	Exobasidiomycetes	Microstromatales	unkn. Microstromatales(o)	unkn. Microstromatales(o)	unkn. Microstromatales(o)	1560	671	228	362		3.8896	1.57331	0.492888	1.09187
unkn. Eukaryota(d)	unkn. Eukaryota(d)	unkn. Eukaryota(d)	unkn. Eukaryota(d)	unkn. Eukaryota(d)	unkn. Eukaryota(d)	2106	3701	5389	3502		5.25095	8.67781	11.6499	10.5628
Ascomycota	unkn. Ascomycota(p)	unkn. Ascomycota(p)	unkn. Ascomycota(p)	unkn. Ascomycota(p)	unkn. Ascomycota(p)	2122	6446	9478	3248		5.29085	15.1141	20.4894	9.79671
Basidiomycota	Exobasidiomycetes	Microstromatales	unkn. Microstromatales(o)	unkn. Microstromatales(o)	Microstromatales sp. CHAM-8	2259	618	211	275		5.63243	1.44904	0.456137	0.829463
Basidiomycota	Agaricostilbomycetes	Agaricostilbales	Kondoaceae	Kondoa	Kondoa yuccicola	2345	2268	1056	229		5.84686	5.31783	2.28285	0.690716
Ascomycota	Dothideomycetes	Dothideales	Saccotheciaceae	Aureobasidium	Aureobasidium pullulans	2495	3322	1969	745		6.22086	7.78916	4.25656	2.24709
Basidiomycota	Exobasidiomycetes	Microstromatales	unkn. Microstromatales(o)	Pseudomicrostroma	Pseudomicrostroma phylloplanum	2982	8191	2819	6643		7.43511	19.2056	6.09408	20.0368
Basidiomycota	Exobasidiomycetes	Microstromatales	Microstromataceae	Microstroma	Microstroma bacarum	6391	1735	685	678		15.9349	4.06809	1.48082	2.045
Ascomycota	Taphrinomycetes	Taphrinales	Taphrinaceae	Taphrina	Taphrina nana	8824	2679	715	2412		22.0011	6.28151	1.54568	7.27514
					Number of ITS reads	40107	42649	46258	33154		100	100	100	100
